# Supplementary material
Source: ML conference proceedings conference paper supplement (https://openaccess.thecvf.com/content/ICCV2025/html/Sadikaj_MultiADS_Defect-aware_Supervision_ICCV_2025_paper.html)
Supplement: Supplementary file 1 [file Sadikaj_MultiADS_Defect-aware_Supervision_ICCV_2025_supplemental.pdf]

# MultiADS: Defect-aware Supervision for Multi-type Anomaly Detection and Segmentation in Zero-Shot Learning

## Supplementary Material

### 1. Our approach

In this section, we will further discuss more details regarding our proposed approach, MultiADS.

#### 1.1. Knowledge Base for Anomalies and Defect-Aware Text Prompts Design

We construct text prompts based on the information we obtain from the Knowledge Base for Anomalies (KBA). This allows for leveraging the specificity of the defect type for each product class. The procedure for defect-aware prompt construction is consistently applied to each dataset. It should be noted, however, that the text prompt regarding the normal state and text template are the same for all datasets.

We conduct experiments on three commonly known datasets, namely MVTec-AD [1], VisA [22], MPDD [9], MAD [19], Real-IAD [15]. We construct multiple distinct defect-aware text prompts and 1 for the normal state, for each dataset. We construct text prompts that represent the normal or good state (without defects) of the images, using the following text prompt template:

*normal* = [ "*[cls]*", "*flawless [cls]*", "*perfect [cls]*", "*unblemished [cls]*", "*[cls] without flaw*", "*[cls] without defect*", "*[cls] without damage*", "*[cls] with immaculate quality*", "*[cls] without any imperfections*", "*[cls] in ideal condition*" ]

where *[cls]* represents a product class from a given dataset. We apply the same normal state design for all datasets, utilizing the text template as in [2] for all datasets as follows:

*text-template* = [ "*a bad photo of a {}.*", "*a low resolution photo of the {}.*", "*a bad photo of the {}.*", "*a cropped photo of the {}.*", "*a bright photo of a {}.*", "*a dark photo of the {}.*", "*a photo of my {}.*", "*a photo of the cool {}.*", "*a close-up photo of a {}.*", "*a black and white photo of the {}.*", "*a bright photo of the {}.*", "*a cropped photo of a {}.*", "*a jpeg corrupted photo of a {}.*", "*a blurry photo of the {}.*", "*a photo of the {}.*", "*a good photo of the {}.*", "*a photo of one {}.*", "*a close-up photo of the {}.*", "*a photo of a {}.*", "*a low resolution photo of a {}.*", "*a photo of a large {}.*", "*a blurry photo of a {}.*", "*a jpeg corrupted photo of the {}.*", "*a good photo of a {}.*", "*a photo of the small {}.*", "*a photo of the large {}.*", "*a black and white photo of a {}.*", "*a dark photo of a {}.*", "*a photo of a cool {}.*", "*a photo*

*of a small {}.*", "*this is a {} in the scene.*", "*this is the {} in the scene.*", "*this is one {} in the scene.*", "*there is the {} in the scene.*", "*there is a {} in the scene.*" ]

where *{}* is filled with content from the normal and defect-aware text prompts.

An example of a text-prompt representing the normal state for product class *[cls] = cable* is as follows:

$$S_{\text{normal}} = \{ \text{"A bad photo of } \textit{cable} \text{."}, \dots, \text{"There is a } \textit{cable} \text{ in ideal condition in the scene."} \} \quad (1)$$

Similarly, we construct text prompts representing distinct defect types. An example of a text-prompt representing the *bent* defect type for product class *[cls] = cable* is as follows:

$$S_{\text{bent}} = \{ \text{"A bad photo of } \textit{cable} \text{ has a bent defect."}, \dots, \text{"There is a bent edge on cable in the scene."} \} \quad (2)$$

In Tables 1-5, we show the defect-aware text prompts for each defect type for all datasets, respectively. Note that for shared defect types among the datasets, such as *bent*, *hole*, and *scratch*, we use the same defect-aware text prompts among all datasets.

We provide the defined defect-aware text prompts, attached to the source code. The simplest way is to adapt the defect-aware information in a suitable manner based on the design of other approaches that aim to investigate defect types in anomaly detection tasks.

In the main manuscript, we mention that the KBA contains the information for defect variations and defect type properties (attributes). Also, we include synonyms of defect types such as *a slight curve*, which can also help VLMs to capture the similarity between image-text pairs. Likewise, we apply the same strategy for the construction of defect-aware text prompts for all defect types. More examples are provided in Tables 1-5. Additionally, Tables 7-12 show variations of each defect type observed from all given datasets, for example *bent* contains variations *bent lead*, *bent wire*, and *bent edge*.

Table 1. Defect-Aware text prompts for all defect types of the VisA dataset. *[cls]* represents a variable that takes as value all product classes in the VisA dataset.

| Defect Type | Defect-Aware Text Prompts                                                                                                                                                                                                                                                                                                             | Defect Type | Defect-Aware Text Prompts                                                                                                                                                                                                                                                                                                                             |
|-------------|---------------------------------------------------------------------------------------------------------------------------------------------------------------------------------------------------------------------------------------------------------------------------------------------------------------------------------------|-------------|-------------------------------------------------------------------------------------------------------------------------------------------------------------------------------------------------------------------------------------------------------------------------------------------------------------------------------------------------------|
| Bent        | <ul style="list-style-type: none"> <li>“<i>[cls]</i> has a bent defect”</li> <li>“flawed <i>[cls]</i> with a bent lead”</li> <li>“a bend found in <i>[cls]</i>”</li> <li>“<i>[cls]</i> has a slight curve defect”</li> <li>“<i>[cls]</i> with noticeable bending”</li> <li>“a bent wire on <i>[cls]</i>”</li> </ul>                   | Broken      | <ul style="list-style-type: none"> <li>“<i>[cls]</i> with a breakage defect”</li> <li>“broken <i>[cls]</i>”</li> <li>“<i>[cls]</i> with broken defect”</li> <li>“<i>[cls]</i> shows breakage”</li> <li>“broken or cracked areas on <i>[cls]</i>”</li> <li>“visible breakage on <i>[cls]</i>”</li> </ul>                                               |
| Bubble      | <ul style="list-style-type: none"> <li>“<i>[cls]</i> with bubbles defect”</li> <li>“bubbles seen on <i>[cls]</i>”</li> <li>“<i>[cls]</i> with bubble marks”</li> <li>“air bubbles in <i>[cls]</i>”</li> <li>“<i>[cls]</i> contains bubble defects”</li> <li>“small bubbles on <i>[cls]</i> surface”</li> </ul>                        | Burnt       | <ul style="list-style-type: none"> <li>“<i>[cls]</i> with a burnt defect”</li> <li>“<i>[cls]</i> shows burn marks”</li> <li>“burnt areas on <i>[cls]</i>”</li> <li>“<i>[cls]</i> with signs of burning”</li> <li>“scorch marks on <i>[cls]</i>”</li> <li>“<i>[cls]</i> appears slightly burnt”</li> </ul>                                             |
| Chip        | <ul style="list-style-type: none"> <li>“<i>[cls]</i> with chip defect”</li> <li>“<i>[cls]</i> with fragment broken defect”</li> <li>“chipped areas on <i>[cls]</i>”</li> <li>“<i>[cls]</i> with chipped parts”</li> <li>“broken fragments on <i>[cls]</i>”</li> <li>“chip marks found on <i>[cls]</i>”</li> </ul>                     | Crack       | <ul style="list-style-type: none"> <li>“<i>[cls]</i> with a crack defect”</li> <li>“<i>[cls]</i> has a visible crack”</li> <li>“cracked areas on <i>[cls]</i>”</li> <li>“<i>[cls]</i> with surface cracking”</li> <li>“fine cracks found on <i>[cls]</i>”</li> <li>“<i>[cls]</i> shows crack lines”</li> </ul>                                        |
| Damage      | <ul style="list-style-type: none"> <li>“<i>[cls]</i> has a damaged defect”</li> <li>“flawed <i>[cls]</i> with damage”</li> <li>“<i>[cls]</i> shows signs of damage”</li> <li>“damage found on <i>[cls]</i>”</li> <li>“<i>[cls]</i> with visible wear and tear”</li> <li>“<i>[cls]</i> with structural damage”</li> </ul>              | Extra       | <ul style="list-style-type: none"> <li>“<i>[cls]</i> with extra thing”</li> <li>“<i>[cls]</i> has a defect with extra thing”</li> <li>“extra material on <i>[cls]</i>”</li> <li>“<i>[cls]</i> contains additional pieces”</li> <li>“<i>[cls]</i> with extra component defect”</li> <li>“unwanted additions on <i>[cls]</i>”</li> </ul>                |
| Hole        | <ul style="list-style-type: none"> <li>“<i>[cls]</i> has a hole defect”</li> <li>“a hole on <i>[cls]</i>”</li> <li>“visible hole on <i>[cls]</i>”</li> <li>“<i>[cls]</i> has small punctures”</li> <li>“<i>[cls]</i> shows perforations”</li> <li>“hole present on <i>[cls]</i>”</li> </ul>                                           | Melded      | <ul style="list-style-type: none"> <li>“<i>[cls]</i> with melded defect”</li> <li>“melded parts on <i>[cls]</i>”</li> <li>“<i>[cls]</i> has fused areas”</li> <li>“fused spots on <i>[cls]</i>”</li> <li>“melded areas on <i>[cls]</i>”</li> <li>“<i>[cls]</i> with melded material”</li> </ul>                                                       |
| Melt        | <ul style="list-style-type: none"> <li>“<i>[cls]</i> with melt defect”</li> <li>“melted areas on <i>[cls]</i>”</li> <li>“<i>[cls]</i> shows melting”</li> <li>“signs of melting on <i>[cls]</i>”</li> <li>“<i>[cls]</i> with melted spots”</li> <li>“<i>[cls]</i> has a melted appearance”</li> </ul>                                 | Missing     | <ul style="list-style-type: none"> <li>“<i>[cls]</i> with a missing defect”</li> <li>“flawed <i>[cls]</i> with something missing”</li> <li>“<i>[cls]</i> has missing parts”</li> <li>“missing components on <i>[cls]</i>”</li> <li>“absent pieces in <i>[cls]</i>”</li> <li>“<i>[cls]</i> is incomplete”</li> </ul>                                   |
| Partical    | <ul style="list-style-type: none"> <li>“<i>[cls]</i> with particles defect”</li> <li>“<i>[cls]</i> has foreign particles”</li> <li>“small particles on <i>[cls]</i>”</li> <li>“<i>[cls]</i> with unwanted particles”</li> <li>“contaminants found on <i>[cls]</i>”</li> <li>“<i>[cls]</i> with visible particles”</li> </ul>          | Scratch     | <ul style="list-style-type: none"> <li>“<i>[cls]</i> has a scratch defect”</li> <li>“flawed <i>[cls]</i> with a scratch”</li> <li>“scratches visible on <i>[cls]</i>”</li> <li>“<i>[cls]</i> has surface scratches”</li> <li>“small scratches found on <i>[cls]</i>”</li> <li>“<i>[cls]</i> with scratch marks”</li> </ul>                            |
| Spot        | <ul style="list-style-type: none"> <li>“<i>[cls]</i> with spot defect”</li> <li>“spots visible on <i>[cls]</i>”</li> <li>“flawed <i>[cls]</i> with spots”</li> <li>“<i>[cls]</i> with visible spotting”</li> <li>“<i>[cls]</i> shows small spots”</li> <li>“surface spots on <i>[cls]</i>”</li> </ul>                                 | Stuck       | <ul style="list-style-type: none"> <li>“<i>[cls]</i> with a stuck defect”</li> <li>“<i>[cls]</i> stuck together”</li> <li>“<i>[cls]</i> has stuck parts”</li> <li>“adhesive issue causing <i>[cls]</i> to stick”</li> <li>“<i>[cls]</i> is partially stuck”</li> <li>“<i>[cls]</i> with adhesion defect”</li> </ul>                                   |
| Weird Wick  | <ul style="list-style-type: none"> <li>“<i>[cls]</i> with a weird wick defect”</li> <li>“<i>[cls]</i> has an unusual wick”</li> <li>“the wick on <i>[cls]</i> appears odd”</li> <li>“<i>[cls]</i> with a strangely shaped wick”</li> <li>“irregular wick found on <i>[cls]</i>”</li> <li>“odd wick defect on <i>[cls]</i>”</li> </ul> | Wrong Place | <ul style="list-style-type: none"> <li>“<i>[cls]</i> with defect that something on wrong place”</li> <li>“<i>[cls]</i> has a misplaced defect”</li> <li>“flawed <i>[cls]</i> with misplacing”</li> <li>“misaligned part on <i>[cls]</i>”</li> <li>“<i>[cls]</i> shows parts out of place”</li> <li>“misplacement detected on <i>[cls]</i>”</li> </ul> |



Table 2. Defect-Aware text prompts for all defect types of the MVTec-AD dataset. *[cls]* represents a variable that takes as value all product classes in the MVTec-AD dataset.

| Defect Type    | Defect-Aware Text Prompts                                                                                                                                                                                                                                                                                                                  | Defect Type   | Defect-Aware Text Prompts                                                                                                                                                                                                                                                                                                                                |
|----------------|--------------------------------------------------------------------------------------------------------------------------------------------------------------------------------------------------------------------------------------------------------------------------------------------------------------------------------------------|---------------|----------------------------------------------------------------------------------------------------------------------------------------------------------------------------------------------------------------------------------------------------------------------------------------------------------------------------------------------------------|
| Bent           | <ul style="list-style-type: none"> <li>“<i>[cls]</i> has a bent defect”</li> <li>“flawed <i>[cls]</i> with a bent lead”</li> <li>“a bend found in <i>[cls]</i>”</li> <li>“<i>[cls]</i> has a slight curve defect”</li> <li>“<i>[cls]</i> with noticeable bending”</li> <li>“a bent wire on <i>[cls]</i>”</li> </ul>                        | Broken        | <ul style="list-style-type: none"> <li>“<i>[cls]</i> has a broken defect”</li> <li>“flawed <i>[cls]</i> with breakage”</li> <li>“visible breakage on <i>[cls]</i>”</li> <li>“<i>[cls]</i> with broken areas”</li> <li>“<i>[cls]</i> shows signs of breaking”</li> <li>“cracked or broken spots on <i>[cls]</i>”</li> </ul>                               |
| Color          | <ul style="list-style-type: none"> <li>“<i>[cls]</i> has a color defect”</li> <li>“inconsistent color on <i>[cls]</i>”</li> <li>“<i>[cls]</i> with color discrepancies”</li> <li>“<i>[cls]</i> has a noticeable color difference”</li> <li>“<i>[cls]</i> with irregular coloring”</li> <li>“<i>[cls]</i> has off-color patches”</li> </ul> | Contamination | <ul style="list-style-type: none"> <li>“<i>[cls]</i> has a contamination defect”</li> <li>“foreign particles on <i>[cls]</i>”</li> <li>“<i>[cls]</i> is contaminated”</li> <li>“<i>[cls]</i> contains contaminants”</li> <li>“<i>[cls]</i> has impurity issues”</li> <li>“traces of contamination on <i>[cls]</i>”</li> </ul>                            |
| Crack          | <ul style="list-style-type: none"> <li>“<i>[cls]</i> has a crack defect”</li> <li>“a crack is present on <i>[cls]</i>”</li> <li>“cracked area on <i>[cls]</i>”</li> <li>“<i>[cls]</i> with noticeable cracking”</li> <li>“fine cracks found on <i>[cls]</i>”</li> <li>“<i>[cls]</i> shows surface cracks”</li> </ul>                       | Cut           | <ul style="list-style-type: none"> <li>“<i>[cls]</i> has a cut defect”</li> <li>“cut marks on <i>[cls]</i>”</li> <li>“<i>[cls]</i> with visible cuts”</li> <li>“a cut detected on <i>[cls]</i>”</li> <li>“<i>[cls]</i> is sliced or cut”</li> <li>“surface cut seen on <i>[cls]</i>”</li> </ul>                                                          |
| Damaged        | <ul style="list-style-type: none"> <li>“<i>[cls]</i> has a damaged defect”</li> <li>“flawed <i>[cls]</i> with damage”</li> <li>“<i>[cls]</i> with visible damage”</li> <li>“damaged areas on <i>[cls]</i>”</li> <li>“physical damage seen on <i>[cls]</i>”</li> <li>“noticeable wear on <i>[cls]</i>”</li> </ul>                           | Fabric        | <ul style="list-style-type: none"> <li>“<i>[cls]</i> has a fabric defect”</li> <li>“<i>[cls]</i> has a fabric border defect”</li> <li>“<i>[cls]</i> has a fabric interior defect”</li> <li>“fabric quality issues on <i>[cls]</i>”</li> <li>“<i>[cls]</i> with textile irregularities”</li> <li>“fabric borders on <i>[cls]</i> show defects”</li> </ul> |
| Faulty Imprint | <ul style="list-style-type: none"> <li>“<i>[cls]</i> has a faulty imprint defect”</li> <li>“<i>[cls]</i> has a print defect”</li> <li>“incorrect printing on <i>[cls]</i>”</li> <li>“misaligned print on <i>[cls]</i>”</li> <li>“printing errors present on <i>[cls]</i>”</li> <li>“<i>[cls]</i> has a blurred print defect”</li> </ul>    | Glue          | <ul style="list-style-type: none"> <li>“<i>[cls]</i> has a glue defect”</li> <li>“<i>[cls]</i> has a glue strip defect”</li> <li>“excess glue on <i>[cls]</i>”</li> <li>“<i>[cls]</i> with uneven glue application”</li> <li>“<i>[cls]</i> has visible glue spots”</li> <li>“misplaced glue seen on <i>[cls]</i>”</li> </ul>                             |
| Hole           | <ul style="list-style-type: none"> <li>“<i>[cls]</i> has a hole defect”</li> <li>“a hole on <i>[cls]</i>”</li> <li>“visible hole on <i>[cls]</i>”</li> <li>“<i>[cls]</i> with punctures”</li> <li>“small hole found in <i>[cls]</i>”</li> <li>“perforations present on <i>[cls]</i>”</li> </ul>                                            | Liquid        | <ul style="list-style-type: none"> <li>“<i>[cls]</i> has a liquid defect”</li> <li>“flawed <i>[cls]</i> with liquid”</li> <li>“<i>[cls]</i> with oil”</li> <li>“liquid marks on <i>[cls]</i>”</li> <li>“<i>[cls]</i> with liquid residue”</li> <li>“stains from liquid on <i>[cls]</i>”</li> </ul>                                                       |
| Misplaced      | <ul style="list-style-type: none"> <li>“<i>[cls]</i> has a misplaced defect”</li> <li>“flawed <i>[cls]</i> with misplacing”</li> <li>“<i>[cls]</i> shows misalignment”</li> <li>“misplaced parts on <i>[cls]</i>”</li> <li>“<i>[cls]</i> with incorrect positioning”</li> <li>“positioning defects on <i>[cls]</i>”</li> </ul>             | Missing       | <ul style="list-style-type: none"> <li>“<i>[cls]</i> has a missing defect”</li> <li>“flawed <i>[cls]</i> with something missing”</li> <li>“<i>[cls]</i> has missing components”</li> <li>“missing parts on <i>[cls]</i>”</li> <li>“<i>[cls]</i> shows absent pieces”</li> <li>“certain parts missing from <i>[cls]</i>”</li> </ul>                       |
| Poke           | <ul style="list-style-type: none"> <li>“<i>[cls]</i> has a poke defect”</li> <li>“<i>[cls]</i> has a poke insulation defect”</li> <li>“visible poke mark on <i>[cls]</i>”</li> <li>“<i>[cls]</i> has puncture marks”</li> <li>“a poke flaw on <i>[cls]</i>”</li> <li>“small poke defect on <i>[cls]</i>”</li> </ul>                        | Rough         | <ul style="list-style-type: none"> <li>“<i>[cls]</i> has a rough defect”</li> <li>“rough texture on <i>[cls]</i>”</li> <li>“uneven surface on <i>[cls]</i>”</li> <li>“<i>[cls]</i> is coarser than expected”</li> <li>“surface roughness seen on <i>[cls]</i>”</li> <li>“texture defects on <i>[cls]</i>”</li> </ul>                                     |
| Scratch        | <ul style="list-style-type: none"> <li>“<i>[cls]</i> has a scratch defect”</li> <li>“flawed <i>[cls]</i> with a scratch”</li> <li>“visible scratches on <i>[cls]</i>”</li> <li>“<i>[cls]</i> with surface scratches”</li> <li>“minor scratches seen on <i>[cls]</i>”</li> <li>“<i>[cls]</i> shows scratch marks”</li> </ul>                | Squeeze       | <ul style="list-style-type: none"> <li>“<i>[cls]</i> has a squeeze defect”</li> <li>“flawed <i>[cls]</i> with a squeeze”</li> <li>“squeezed area on <i>[cls]</i>”</li> <li>“<i>[cls]</i> has compression marks”</li> <li>“<i>[cls]</i> appears squeezed”</li> <li>“flattened areas on <i>[cls]</i>”</li> </ul>                                           |
| Thread         | <ul style="list-style-type: none"> <li>“<i>[cls]</i> has a thread defect”</li> <li>“flawed <i>[cls]</i> with a thread”</li> <li>“loose threads on <i>[cls]</i>”</li> <li>“<i>[cls]</i> has visible threads”</li> <li>“untrimmed threads on <i>[cls]</i>”</li> <li>“threads sticking out on <i>[cls]</i>”</li> </ul>                        |               |                                                                                                                                                                                                                                                                                                                                                          |

Table 3. Defect-Aware text prompts for all defect types of the MPDD dataset. *[cls]* represents a variable that takes as value all product classes in the MPDD dataset.

| Defect Type | Defect-Aware Text Prompts                                                                                                                                                                                                          | Defect Type        | Defect-Aware Text Prompts                                                                                                                                                                                                            |
|-------------|------------------------------------------------------------------------------------------------------------------------------------------------------------------------------------------------------------------------------------|--------------------|--------------------------------------------------------------------------------------------------------------------------------------------------------------------------------------------------------------------------------------|
| Bent        | “[cls] has a bent defect”<br>“flawed [cls] with a bent lead”<br>“a bend found in [cls]”<br>“[cls] has a slight curve defect”<br>“[cls] with noticeable bending”<br>“a bent wire on [cls]”                                          | Defective Painting | “[cls] with a defective painting defect”<br>“flawed [cls] with painting imperfections”<br>“[cls] has painting inconsistencies”<br>“uneven painting on [cls]”<br>“[cls] shows poor paint quality”<br>“paint defects present on [cls]” |
| Flattening  | “[cls] becomes flattened”<br>“[cls] has a flatten defect”<br>“flattening observed on [cls]”<br>“[cls] appears compressed”<br>“[cls] is flattened or squashed”<br>“deformation detected on [cls]”                                   | Hole               | “[cls] with a hole defect”<br>‘a hole on [cls]’<br>‘visible hole in [cls]’<br>“[cls] with puncture marks”<br>‘hole detected in [cls]’<br>“[cls] has small perforations”                                                              |
| Mismatch    | “[cls] with bend and parts mismatch defect”<br>“[cls] with parts mismatch defect”<br>“[cls] has mismatched parts”<br>“mismatched components on [cls]”<br>“bend and parts misalignment in [cls]”<br>“[cls] shows part misplacement” | Rust               | “[cls] with a rust defect”<br>“[cls] has rust patches”<br>“rust spots on [cls]”<br>“visible rust on [cls]”<br>“[cls] shows signs of rusting”<br>“[cls] affected by corrosion”                                                        |
| Scratch     | “[cls] has a scratch defect”<br>“flawed [cls] with a scratch”<br>‘scratches visible on [cls]’<br>“[cls] with surface scratches”<br>“[cls] has scratch marks”<br>“minor scratches found on [cls]”                                   |                    |                                                                                                                                                                                                                                      |

Table 4. Defect-Aware text prompts for all defect types of the MAD dataset. *[cls]* represents a variable that takes as value all product classes in the MAD dataset.

| Defect Type | Defect-Aware Text Prompts                                                                                                                                                                                   | Defect Type | Defect-Aware Text Prompts                                                                                                                                                                                |
|-------------|-------------------------------------------------------------------------------------------------------------------------------------------------------------------------------------------------------------|-------------|----------------------------------------------------------------------------------------------------------------------------------------------------------------------------------------------------------|
| Burr        | “[cls] has a burr defect”<br>“sharp burr found on [cls]”<br>“[cls] has excess material on edges”<br>“burr formation detected on [cls]”<br>“[cls] exhibits rough edges”<br>“[cls] shows protruding material” | Missing     | “[cls] has a missing defect”<br>“flawed [cls] with something missing”<br>“[cls] has missing components”<br>“missing parts on [cls]”<br>“[cls] shows absent pieces”<br>“certain parts missing from [cls]” |
| Stain       | “[cls] with a stain defect”<br>“inconsistent color on [cls]”<br>“[cls] with color discrepancies”                                                                                                            |             |                                                                                                                                                                                                          |

## 2. Datasets

Due to space limitations in the main manuscript, here we describe in detail the industrial anomaly detection datasets: MVTec-AD [1], VisA [22], MPDD [9], MAD (simulated and real) [19], and Real-IAD [15]. Key statistics on the datasets are shown in Table 6, such as categories, distinct classes, and the number of samples. MVTec-AD dataset consists of two categories, namely objects and textures, and 15 product classes. For each product, there can be a different number of defects, as shown in Table 7. This number varies from 1 up to 8, but for the textures, it is 5 for all products. We classify each defect to the defect type as we defined before.

Additionally, we provide more details about defect types in order to highlight the importance and the de-

sign of our defect-aware text prompts. Thus, details of the VisA datasets are shown in Table 8; the products are categorized into complex structures, multiple instances (an image with multiple products of the same class, e.g., multiple candles, multiple capsules), and single instances. In total, it consists of 130 defect types if we consider different combinations of defect types, but if we consider the combination as a single defect type, then the VisA dataset has 84 defect types and 40 distinct defect types. In Table 8, some defect types are included as part of the *Combined* defect type, which consists of multiple defect types. The number of defect types for each product varies between 5 and 9 defect types. In Table 9, we show detailed information regarding the MPDD dataset, which consists of 6 product types and 11

Table 5. Defect-Aware text prompts for all defect types of the Real-IAD dataset.  $[cls]$  represents a variable that takes as value all product classes in the Real-IAD dataset.

| Defect Type | Defect-Aware Text Prompts                                                                                                                                                                                                                                                                                                                                      | Defect Type   | Defect-Aware Text Prompts                                                                                                                                                                                                                                                                                         |
|-------------|----------------------------------------------------------------------------------------------------------------------------------------------------------------------------------------------------------------------------------------------------------------------------------------------------------------------------------------------------------------|---------------|-------------------------------------------------------------------------------------------------------------------------------------------------------------------------------------------------------------------------------------------------------------------------------------------------------------------|
| Pit         | <p>“<math>[cls]</math> has a pit defect”</p> <p>“Small cavities or pits detected on <math>[cls]</math>”</p> <p>“<math>[cls]</math> with color discrepancies”</p>                                                                                                                                                                                               | Scratch       | <p>“<math>[cls]</math> has a scratch defect”</p> <p>“flawed <math>[cls]</math> with a scratch”</p> <p>“scratches visible on <math>[cls]</math>”</p> <p>“<math>[cls]</math> with surface scratches”</p> <p>“<math>[cls]</math> has scratch marks”</p> <p>“minor scratches found on <math>[cls]</math>”</p>         |
| Deformation | <p>“<math>[cls]</math> has a deformation defect”</p> <p>“<math>[cls]</math> appears twisted or misshaped”</p> <p>“Structural distortion detected on <math>[cls]</math>”</p> <p>“Unexpected shape deformation found in <math>[cls]</math>”</p> <p>“<math>[cls]</math> exhibits rough edges”</p> <p>“<math>[cls]</math> shows signs of bending under stress”</p> | Deformation   | <p>“<math>[cls]</math> has an abrasion defect”</p> <p>“<math>[cls]</math> has noticeable or scuffing”</p> <p>“<math>[cls]</math> is affected by continuous rubbing”</p> <p>“Worn or scraped areas found on <math>[cls]</math>”</p>                                                                                |
| Damaged     | <p>“<math>[cls]</math> has a damaged defect”</p> <p>“flawed <math>[cls]</math> with damage”</p> <p>“<math>[cls]</math> with visible damage”</p> <p>“damaged areas on <math>[cls]</math>”</p> <p>“physical damage seen on <math>[cls]</math>”</p> <p>“noticeable wear on <math>[cls]</math>”</p>                                                                | Missing       | <p>“<math>[cls]</math> has a missing defect”</p> <p>“flawed <math>[cls]</math> with something missing”</p> <p>“<math>[cls]</math> has missing components”</p> <p>“missing parts on <math>[cls]</math>”</p> <p>“<math>[cls]</math> shows absent pieces”</p> <p>“certain parts missing from <math>[cls]</math>”</p> |
| Foreign     | <p>“<math>[cls]</math> has foreign objects defect”</p> <p>“<math>[cls]</math> has a foreign defect”</p> <p>“Unexpected foreign material on <math>[cls]</math>”</p> <p>“<math>[cls]</math> contains an unwanted foreign object”</p> <p>“<math>[cls]</math> with extra thing”</p> <p>“<math>[cls]</math> has a defect with extra thing”</p>                      | Contamination | <p>“<math>[cls]</math> has a contamination defect”</p> <p>“foreign particles on <math>[cls]</math>”</p> <p>“<math>[cls]</math> is contaminated”</p> <p>“<math>[cls]</math> contains contaminants”</p> <p>“<math>[cls]</math> has impurity issues”</p> <p>“traces of contamination on <math>[cls]</math>”</p>      |

Table 6. Key statistics on the datasets.

| Dataset       | Category          | $ \mathcal{C} $ | Normal / Anomalous Samples |
|---------------|-------------------|-----------------|----------------------------|
| MVTec-AD [1]  | Object<br>Texture | 15              | 4,096 / 1,258              |
| VisA [22]     | Object            | 12              | 9,621 / 1,200              |
| MPDD [9]      | Object            | 6               | 1,064 / 282                |
| MAD [19]      | Object            | 20              | 5,231 / 4,902              |
| Real-IAD [15] | Object            | 30              | 99,721 / 51,329            |

defect types, from which 8 are distinct defect types. The number of defect types for each product varies between 1 and 3 defect types. The MAD dataset consists of multi-purpose views of twenty LEGO toys (product classes), with up to three anomaly types. It has simulated and real images. The Real-IAD dataset consists of thirty product categories, up to four defect types per category, and a larger proportion of defect area and range of defect ratios than other datasets. We utilize single-view image data. The details are illustrated in Table 6.

We apply the default normalization of CLIP [13] to all datasets. After normalization, we resize the images to a resolution of (518, 518) to obtain an appropriate visual feature map resolution.

Table 7. Detailed statistics on the MVTec-AD dataset.

| Category | Product    | Defects              | Defect Type    | Original Test |        |
|----------|------------|----------------------|----------------|---------------|--------|
|          |            |                      |                | Anomalous     | Normal |
| Objects  | Bottle     | Broken Large         | Broken         | 20            | 20     |
|          |            | Broken Small         | Broken         | 22            |        |
|          |            | Contamination        | Contamination  | 21            |        |
|          | Cable      | Bent Wire            | Bent           | 13            | 58     |
|          |            | Cable Swap           | Misplaced      | 12            |        |
|          |            | Combined             | Combined       | 11            |        |
|          |            | Cut Inner Insulation | Cut            | 14            |        |
|          |            | Cut Outer Insulation | Cut            | 10            |        |
|          |            | Missing Cable        | Missing        | 12            |        |
|          | Capsule    | Missing Wire         | Missing        | 10            | 23     |
|          |            | Poke Insulation      | Poke           | 10            |        |
|          |            | Crack                | Crack          | 23            |        |
|          | Hazelnut   | Faulty Imprint       | Faulty Imprint | 22            | 40     |
|          |            | Poke                 | Poke           | 21            |        |
|          |            | Scratch              | Scratch        | 23            |        |
|          |            | Squeeze              | Squeeze        | 20            |        |
|          | Metal Nut  | Crack                | Crack          | 18            | 22     |
|          |            | Cut                  | Cut            | 17            |        |
|          |            | Hole                 | Hole           | 18            |        |
|          |            | Print                | Faulty Imprint | 17            |        |
| Textures | Pill       | Bent                 | Bent           | 25            | 26     |
|          |            | Color                | Color          | 22            |        |
|          |            | Flip                 | Misplaced      | 23            |        |
|          |            | Scratch              | Scratch        | 23            |        |
|          | Screw      | Color                | Color          | 25            | 41     |
|          |            | Combined             | Combined       | 17            |        |
|          |            | Contamination        | Contamination  | 21            |        |
|          |            | Crack                | Crack          | 26            |        |
|          | Toothbrush | Faulty Imprint       | Faulty Imprint | 19            | 30     |
|          |            | Pill Type            | Damaged        | 9             |        |
|          |            | Scratch              | Scratch        | 24            |        |
|          |            | Manipulated Front    | Bent           | 24            | 60     |
|          | Transistor | Scratch Head         | Scratch        | 24            |        |
|          |            | Scratch Neck         | Scratch        | 25            |        |
|          |            | Thread Side          | Thread         | 23            |        |
|          | Zipper     | Thread Top           | Thread         | 23            | 32     |
|          |            | Defective            | Damaged        | 12            |        |
|          |            | Bent Lead            | Bent           | 10            |        |
|          |            | Cut Lead             | Cut            | 10            |        |
|          | Carpet     | Damaged Case         | Damaged        | 10            | 21     |
|          |            | Misplaced            | Misplaced      | 10            |        |
|          |            | Broken Teeth         | Broken         | 19            |        |
|          |            | Combined             | Combined       | 16            |        |
|          | Grid       | Fabric Border        | Fabric         | 17            | 32     |
|          |            | Fabric Interior      | Fabric         | 16            |        |
|          |            | Rough                | Rough          | 17            |        |
|          |            | Split Teeth          | Misplaced      | 18            |        |
|          | Leather    | Squeezed Teeth       | Squeezed       | 16            | 33     |
|          |            | Color                | Color          | 19            |        |
|          |            | Cut                  | Cut            | 17            |        |
|          |            | Hole                 | Hole           | 17            |        |
|          | Tile       | Metal Contamination  | Contamination  | 17            | 19     |
|          |            | Thread               | Thread         | 19            |        |
|          |            | Bent                 | Broken         | 12            |        |
|          |            | Broken               | Broken         | 12            |        |
|          | Wood       | Glue                 | Glue           | 11            | 32     |
|          |            | Glue                 | Glue           | 11            |        |
|          |            | Metal Contamination  | Contamination  | 11            |        |
|          |            | Thread               | Thread         | 11            |        |
|          | Leather    | Color                | Color          | 19            | 32     |
|          |            | Cut                  | Cut            | 19            |        |
|          |            | Fold                 | Misplaced      | 17            |        |
|          |            | Glue                 | Glue           | 19            |        |
|          | Tile       | Poke                 | Poke           | 18            | 33     |
|          |            | Crack                | Crack          | 17            |        |
|          |            | Glue Strip           | Glue           | 18            |        |
|          |            | Gray Stroke          | Damaged        | 16            |        |
|          | Wood       | Oil                  | Liquid         | 18            | 19     |
|          |            | Rough                | Rough          | 15            |        |
|          |            | Color                | Color          | 8             |        |
|          |            | Combined             | Combined       | 11            |        |
|          | Carpet     | Hole                 | Hole           | 10            | 32     |
|          |            | Liquid               | Liquid         | 10            |        |
|          |            | Scratch              | Scratch        | 21            |        |
|          |            | Scratch              | Scratch        | 21            |        |

Table 8. Detailed statistics on the VisA dataset. We relabeled every image originally marked as “combined” in the VisA dataset by identifying each individual defect it contains and assigning the image to all corresponding defect categories.

| Category           | Product    | Defects                          | Defect Type | Test      |        |
|--------------------|------------|----------------------------------|-------------|-----------|--------|
|                    |            |                                  |             | Anomalous | Normal |
| Complex Structure  | Pcb1       | Bent                             | Bent        | 15        | 100    |
|                    |            | Melt                             | Melt        | 52        |        |
|                    |            | Missing                          | Missing     | 20        |        |
|                    | Pcb2       | Scratch                          | Scratch     | 21        | 100    |
|                    |            | Bent                             | Bent        | 15        |        |
|                    |            | Melt                             | Melt        | 54        |        |
|                    | Pcb3       | Missing                          | Missing     | 19        | 101    |
|                    |            | Scratch                          | Scratch     | 19        |        |
|                    |            | Bent                             | Bent        | 20        |        |
|                    | Pcb4       | Melt                             | Melt        | 41        | 101    |
|                    |            | Missing                          | Missing     | 20        |        |
|                    |            | Scratch                          | Scratch     | 25        |        |
| Multiple Instances | Candle     | Burnt                            | Burnt       | 8         | 100    |
|                    |            | Scratch                          | Scratch     | 17        |        |
|                    |            | Dirt                             | Dirt        | 39        |        |
|                    | Capsules   | Damage                           | Damage      | 19        | 101    |
|                    |            | Extra                            | Extra       | 26        |        |
|                    |            | Missing                          | Missing     | 33        |        |
|                    | Macaroni1  | Wrong Place                      | Wrong Place | 12        | 100    |
|                    |            | Chunk of Wax Missing             | Missing     | 15        |        |
|                    |            | Damaged Corner of Packaging      | Damaged     | 25        |        |
|                    | Macaroni2  | Different Colour Spot            | Spot        | 22        | 60     |
|                    |            | Extra Wax in Candle              | Extra       | 9         |        |
|                    |            | Foreign Particals on Candle      | Particals   | 17        |        |
| Single Instance    | Cashew     | Wax Melded Out of the Candle     | Melded      | 13        | 50     |
|                    |            | Weird Candle Wick                | Weird Wick  | 11        |        |
|                    |            | Bubble                           | Bubble      | 49        |        |
|                    | Fryum      | Discolor                         | Discolor    | 15        | 50     |
|                    |            | Scratch                          | Scratch     | 15        |        |
|                    |            | Leak                             | Leak        | 20        |        |
|                    | Pipe Fryum | Misheap                          | Damaged     | 20        | 50     |
|                    |            | Chip Around Edge and Corner      | Chip        | 25        |        |
|                    |            | Different Colour Spot            | Spot        | 37        |        |
|                    | Chewinggum | Similar Colour Spot              | Spot        | 14        | 50     |
|                    |            | Small Cracks                     | Crack       | 10        |        |
|                    |            | Middle Breakage                  | Broken      | 27        |        |
| Single Instance    | Cashew     | Small Scratches                  | Scratches   | 27        | 50     |
|                    |            | Breakage down the Middle         | Broken      | 10        |        |
|                    |            | Color Spot Similar to the Object | Spot        | 35        |        |
|                    | Fryum      | Different Color Spot             | Spot        | 25        | 50     |
|                    |            | Small Chip Around Edge           | Chip        | 25        |        |
|                    |            | Small Cracks                     | Cracks      | 12        |        |
|                    | Pipe Fryum | Small Scratches                  | Scratches   | 25        | 50     |
|                    |            | Burnt                            | Burnt       | 15        |        |
|                    |            | Corner or Edge Breakage          | Broken      | 25        |        |
|                    | Chewinggum | Middle Breakage                  | Broken      | 25        | 50     |
|                    |            | Different Colour Spot            | Spot        | 25        |        |
|                    |            | Same Colour Spot                 | Spot        | 28        |        |
| Single Instance    | Cashew     | Small Holes                      | Hole        | 9         | 50     |
|                    |            | Small Scratches                  | Scratch     | 20        |        |
|                    |            | Stuck Together                   | Stuck       | 6         |        |
|                    | Fryum      | Chunk of Gum Missing             | Missing     | 70        | 50     |
|                    |            | Corner Missing                   | Missing     | 14        |        |
|                    |            | Scratches                        | Scratch     | 25        |        |
|                    | Pipe Fryum | Similar Colour Spot              | Spot        | 28        | 50     |
|                    |            | Small Cracks                     | Crack       | 9         |        |
|                    |            | Burnt                            | Burnt       | 30        |        |
|                    | Chewinggum | Corner or Edge Breakage          | Broken      | 36        | 50     |
|                    |            | Middle Breakage                  | Broken      | 20        |        |
|                    |            | Different Colour Spot            | Spot        | 16        |        |
| Single Instance    | Cashew     | Similar Colour Spot              | Spot        | 36        | 50     |
|                    |            | Small Cracks                     | Crack       | 28        |        |
|                    |            | Burnt                            | Burnt       | 9         |        |
|                    | Fryum      | Corner or Edge Breakage          | Broken      | 30        | 50     |
|                    |            | Middle Breakage                  | Broken      | 36        |        |
|                    |            | Different Colour Spot            | Spot        | 20        |        |
|                    | Pipe Fryum | Similar Colour Spot              | Spot        | 31        | 50     |
|                    |            | Small Cracks                     | Crack       | 22        |        |
|                    |            | Stuck Together                   | Stuck       | 10        |        |
|                    | Chewinggum | Small Scratches                  | Scratch     | 10        | 50     |
|                    |            | Stuck Together                   | Stuck       | 10        |        |
|                    |            | Small Cracks                     | Crack       | 10        |        |

Table 9. Detailed statistics on the MPDD dataset.

| Product       | Defects                         | Defect Type                   | Original Test |        |
|---------------|---------------------------------|-------------------------------|---------------|--------|
|               |                                 |                               | Anomalous     | Normal |
| Bracket Black | Hole Scratches                  | Hole Scratch                  | 12<br>35      | 32     |
| Bracket Brown | Bend Mismatch<br>Parts Mismatch | Mismatch<br>Mismatch          | 17<br>45      | 26     |
| Bracket White | Defective Painting<br>Scratches | Defective Painting<br>Scratch | 13<br>17      | 30     |
| Connector     | Parts Mismatch                  | Mismatch                      | 14            | 30     |
| Metal Plate   | Major Rust                      | Rust                          | 14            | 26     |
|               | Scratches                       | Scratch                       | 34            |        |
|               | Total Rust                      | Rust                          | 23            |        |
| Tubes         | Anomalous                       | Flattening                    | 69            | 32     |

Table 10. Detailed statistics on the MAD-real dataset.

| Product  | Defects | Defect Type | Original Test |        |
|----------|---------|-------------|---------------|--------|
|          |         |             | Anomalous     | Normal |
| Bear     | Stains  | Stains      | 24            | 5      |
| Bird     | Missing | Missing     | 22            | 5      |
| Elephant | Missing | Missing     | 18            | 5      |
| Parrot   | Missing | Missing     | 23            | 5      |
| Puppy    | Stains  | Stains      | 20            | 5      |
| Scorpion | Missing | Missing     | 23            | 5      |
| Turtle   | Stains  | Stains      | 21            | 5      |
| Unicorn  | Missing | Missing     | 21            | 5      |
| Whale    | Stains  | Stains      | 32            | 5      |

Table 11. Detailed statistics on the MAD-sim dataset.

| Product    | Defects | Defect Type | Original Test |        |
|------------|---------|-------------|---------------|--------|
|            |         |             | Anomalous     | Normal |
| Bear       | Burrs   | Burrs       | 88            | 36     |
|            | Missing | Missing     | 112           |        |
|            | Stains  | Stains      | 59            |        |
| Bird       | Burrs   | Burrs       | 51            | 30     |
|            | Missing | Missing     | 160           |        |
|            | Stains  | Stains      | 40            |        |
| Cat        | Burrs   | Burrs       | 98            | 36     |
|            | Missing | Missing     | 151           |        |
|            | Stains  | Stains      | 58            |        |
| Elephant   | Burrs   | Burrs       | 72            | 36     |
|            | Missing | Missing     | 149           |        |
|            | Stains  | Stains      | 55            |        |
| Gorilla    | Burrs   | Burrs       | 67            | 20     |
|            | Missing | Missing     | 137           |        |
|            | Stains  | Stains      | 35            |        |
| Mallard    | Burrs   | Burrs       | 27            | 20     |
|            | Missing | Missing     | 157           |        |
|            | Stains  | Stains      | 33            |        |
| Obesobeso  | Burrs   | Burrs       | 101           | 36     |
|            | Missing | Missing     | 123           |        |
|            | Stains  | Stains      | 61            |        |
| Owl        | Burrs   | Burrs       | 41            | 30     |
|            | Missing | Missing     | 115           |        |
|            | Stains  | Stains      | 44            |        |
| Parrot     | Burrs   | Burrs       | 29            | 36     |
|            | Missing | Missing     | 131           |        |
|            | Stains  | Stains      | 42            |        |
| Pheonix    | Burrs   | Burrs       | 86            | 36     |
|            | Missing | Missing     | 150           |        |
|            | Stains  | Stains      | 69            |        |
| Pig        | Burrs   | Burrs       | 76            | 36     |
|            | Missing | Missing     | 138           |        |
|            | Stains  | Stains      | 70            |        |
| Puppy      | Burrs   | Burrs       | 63            | 36     |
|            | Missing | Missing     | 125           |        |
|            | Stains  | Stains      | 47            |        |
| Sabertooth | Burrs   | Burrs       | 58            | 36     |
|            | Missing | Missing     | 136           |        |
|            | Stains  | Stains      | 47            |        |
| Scorpion   | Burrs   | Burrs       | 61            | 36     |
|            | Missing | Missing     | 121           |        |
|            | Stains  | Stains      | 53            |        |
| Sheep      | Burrs   | Burrs       | 39            | 36     |
|            | Missing | Missing     | 150           |        |
|            | Stains  | Stains      | 63            |        |
| Swan       | Burrs   | Burrs       | 66            | 36     |
|            | Missing | Missing     | 143           |        |
|            | Stains  | Stains      | 41            |        |
| Turtle     | Burrs   | Burrs       | 32            | 20     |
|            | Missing | Missing     | 130           |        |
|            | Stains  | Stains      | 35            |        |
| Unicorn    | Burrs   | Burrs       | 55            | 20     |
|            | Missing | Missing     | 132           |        |
|            | Stains  | Stains      | 35            |        |
| Whale      | Burrs   | Burrs       | 71            | 30     |
|            | Missing | Missing     | 127           |        |
|            | Stains  | Stains      | 53            |        |
| Zalika     | Burrs   | Burrs       | 56            | 36     |
|            | Missing | Missing     | 130           |        |
|            | Stains  | Stains      | 57            |        |

Table 12. Detailed statistics on the Real-IAD dataset (Part I).

| Product           | Defects         | Defect Type     | Original Test |           |
|-------------------|-----------------|-----------------|---------------|-----------|
|                   |                 |                 | Normal        | Anomalous |
| Audiojack         | Deformation     | Deformation     | 398           | 126       |
|                   | Scratch         | Scratch         |               | 4         |
|                   | Missing         | Missing         |               | 56        |
|                   | Contamination   | Contamination   |               | 27        |
| Bottle Cap        | Pit             | Pit             | 369           | 65        |
|                   | Scratch         | Scratch         |               | 125       |
|                   | Missing Parts   | Missing Parts   |               | 1         |
|                   | Contamination   | Contamination   |               | 73        |
| Button Battery    | Pit             | Pit             | 291           | 123       |
|                   | Abrasion        | Abrasion        |               | 68        |
|                   | Scratch         | Scratch         |               | 109       |
|                   | Contamination   | Contamination   |               | 117       |
| End Cap           | Scratch         | Scratch         | 289           | 92        |
|                   | Damage          | Damage          |               | 119       |
|                   | Missing Parts   | Missing Parts   |               | 133       |
|                   | Contamination   | Contamination   |               | 80        |
| Eraser            | Pit             | Pit             | 389           | 36        |
|                   | Scratch         | Scratch         |               | 101       |
|                   | Missing Parts   | Missing Parts   |               | 30        |
|                   | Contamination   | Contamination   |               | 68        |
| Fire Hood         | Pit             | Pit             | 418           | 33        |
|                   | Scratch         | Scratch         |               | 51        |
|                   | Missing Parts   | Missing Parts   |               | 62        |
|                   | Contamination   | Contamination   |               | 23        |
| Mint              | Missing Parts   | Missing Parts   | 305           | 111       |
|                   | Foreign Objects | Foreign Objects |               | 197       |
|                   | Contamination   | Contamination   |               | 142       |
|                   |                 |                 |               |           |
| Mounts            | Pit             | Pit             | 385           | 30        |
|                   | Missing Parts   | Missing Parts   |               | 131       |
|                   | Contamination   | Contamination   |               | 79        |
|                   |                 |                 |               |           |
| Pcb               | Scratch         | Scratch         | 278           | 103       |
|                   | Missing Parts   | Missing Parts   |               | 104       |
|                   | Foreign Objects | Foreign Objects |               | 129       |
|                   | Contamination   | Contamination   |               | 109       |
| Phone Battery     | Pit             | Pit             | 349           | 38        |
|                   | Scratch         | Scratch         |               | 28        |
|                   | Damage          | Damage          |               | 125       |
|                   | Contamination   | Contamination   |               | 110       |
| Plastic Nut       | Pit             | Pit             | 442           | 14        |
|                   | Scratch         | Scratch         |               | 13        |
|                   | Missing Parts   | Missing Parts   |               | 56        |
|                   | Contamination   | Contamination   |               | 35        |
| Plastic Plug      | Pit             | Pit             | 368           | 121       |
|                   | Scratch         | Scratch         |               | 58        |
|                   | Missing Parts   | Missing Parts   |               | 31        |
|                   | Contamination   | Contamination   |               | 52        |
| Porcelain Doll    | Abrasion        | Abrasion        | 402           | 64        |
|                   | Scratch         | Scratch         |               | 43        |
|                   | Contamination   | Contamination   |               | 89        |
|                   |                 |                 |               |           |
| Regulator         | Scratch         | Scratch         | 477           | 3         |
|                   | Missing Parts   | Missing Parts   |               | 63        |
|                   | Pit             | Pit             |               | 170       |
|                   | Contamination   | Contamination   |               | 172       |
| Rolled Strip Base | Missing Parts   | Missing Parts   | 250           | 167       |
|                   | Contamination   | Contamination   |               | 172       |
|                   |                 |                 |               |           |
|                   |                 |                 |               |           |
| Sim Card Set      | Abrasion        | Abrasion        | 305           | 148       |
|                   | Scratch         | Scratch         |               | 80        |
|                   | Contamination   | Contamination   |               | 168       |
|                   |                 |                 |               |           |
| Switch            | Scratch         | Scratch         | 266           | 164       |
|                   | Missing Parts   | Missing Parts   |               | 152       |
|                   | Contamination   | Contamination   |               | 161       |
|                   |                 |                 |               |           |
| Tape              | Damage          | Damage          | 397           | 128       |
|                   | Missing Parts   | Missing Parts   |               | 76        |
|                   | Contamination   | Contamination   |               | 21        |
|                   |                 |                 |               |           |

Table 13. Detailed statistics on the Real-IAD dataset (Part II).

| Product       | Defects       | Defect Type   | Original Test |           |
|---------------|---------------|---------------|---------------|-----------|
|               |               |               | Normal        | Anomalous |
| Terminalblock | Pit           | Pit           | 308           | 142       |
|               | Missing Parts | Missing Parts |               | 145       |
|               | Contamination | Contamination |               | 106       |
|               |               |               |               |           |
| Toothbrush    | Abrasion      | Abrasion      | 272           | 170       |
|               | Missing Parts | Missing Parts |               | 137       |
|               | Contamination | Contamination |               | 149       |
|               |               |               |               |           |
| Toy           | Pit           | Pit           | 250           | 125       |
|               | Scratch       | Scratch       |               | 127       |
|               | Missing Parts | Missing Parts |               | 126       |
|               | Contamination | Contamination |               | 126       |
| Toy-brick     | Pit           | Pit           | 370           | 67        |
|               | Scratch       | Scratch       |               | 60        |
|               | Missing Parts | Missing Parts |               | 81        |
|               | Contamination | Contamination |               | 53        |
| Transistor1   | Deformation   | Deformation   | 265           | 171       |
|               | Missing Parts | Missing Parts |               | 164       |
|               | Contamination | Contamination |               | 134       |
|               |               |               |               |           |
| U Block       | Abrasion      | Abrasion      | 436           | 20        |
|               | Scratch       | Scratch       |               | 17        |
|               | Missing Parts | Missing Parts |               | 44        |
|               | Contamination | Contamination |               | 45        |
| Usb           | Deformation   | Deformation   | 353           | 127       |
|               | Scratch       | Scratch       |               | 54        |
|               | Missing Parts | Missing Parts |               | 83        |
|               | Contamination | Contamination |               | 39        |
| Usb Adaptor   | Pit           | Pit           | 361           | 85        |
|               | Abrasion      | Abrasion      |               | 22        |
|               | Scratch       | Scratch       |               | 62        |
|               | Contamination | Contamination |               | 111       |
| Vcpill        | Pit           | Pit           | 398           | 50        |
|               | Scratch       | Scratch       |               | 11        |
|               | Missing Parts | Missing Parts |               | 107       |
|               | Contamination | Contamination |               | 40        |
| Wooden Beads  | Pit           | Pit           | 304           | 67        |
|               | Scratch       | Scratch       |               | 96        |
|               | Missing Parts | Missing Parts |               | 112       |
|               | Contamination | Contamination |               | 117       |
| Woodstick     | Pit           | Pit           | 442           | 7         |
|               | Scratch       | Scratch       |               | 12        |
|               | Missing Parts | Missing Parts |               | 69        |
|               | Contamination | Contamination |               | 28        |
| Zipper        | Deformation   | Deformation   | 250           | 125       |
|               | Damage        | Damage        |               | 121       |
|               | Missing Parts | Missing Parts |               | 125       |
|               | Contamination | Contamination |               | 129       |

### 3. Baselines

To demonstrate the performance of MultiADS, we compare MultiADS with broad SOTA baselines. We run experiments for April-GAN [2], and other baseline results are taken from original papers. If the baseline does not report results for a specific dataset, then the results are taken from the latest publication, which includes these results. Details regarding each baseline are given as follows:

- PaDiM [4] utilizes a pre-trained Convolutional Neural Network (CNN) for patch embedding and multivariate Gaussian distributions to get a probabilistic representation for a one-class learning setting, the normal class. Also, it considers the semantic relations of CNN to improve the localization. Results are taken from [2, 16] baselines. Source code is available at <https://github.com/taikiinoue45/PaDiM>.
- CLIP [13] is a powerful zero-shot classification method. Results are taken from [20] baseline, and to perform the anomaly detection task, they use two classes of text prompt templates "A photo of a normal [cls]" and "A photo of an anomalous [cls]", where "cls" denotes the target class name. The anomaly score is computed according to Eq. [1] in the main manuscript. As for anomaly segmentation, they extend the above computation to local visual embedding to derive the segmentation. Source code is available at <https://github.com/openai/CLIP>.
- CLIP-AC [13] employs an ensemble of text prompt templates that are recommended for the ImageNet dataset [13]. Results are taken from [20] baseline, and they average the generated textual embeddings of normal and anomaly classes, respectively, and compute the probability and segmentation in the same way as CLIP. Source code is available at <https://github.com/openai/CLIP>.
- RegAD [6] is a few-shot learning approach that leverages feature registration as a category-agnostic approach. This approach trains a single generalizable model and does not require re-training or parameter fine-tuning for new categories. Results are taken from the original publication. Source code is available at <https://github.com/MediaBrain-SJTU/RegAD>.
- CoOp [18] is a representative method for prompt learning. Results are taken from [20] baseline for zero-shot setting and from [21] for few-shot setting. To adapt CoOp to zero- and few-shot anomaly detection, authors of [20, 21] replace its learnable text prompt templates  $[V_1][V_2] \dots [V_N][cls]$  with normality and abnormality text prompt tem-

plates, where  $V_i$  is the learnable word embeddings. The normality text prompt template is defined as  $[V_1][V_2] \dots [V_N][normal][cls]$ , and the abnormality one is defined as  $[V_1][V_2] \dots [V_N][anomalous][cls]$ . Anomaly probabilities and segmentation are obtained in the same way as for AnomalyCLIP, and all parameters are kept the same as in the original paper. Source code is available at <https://github.com/KaiyangZhou/CoOp>.

- CoCoOp [17] extends the CoOp work by generalizing the learned context to wider unseen classes within the same dataset. CoCoOp learns a lightweight neural network to generate for each image an input-conditional token (vector), and the proposed dynamic prompts adapt to each instance and are less sensitive to class shift. Results are taken from [20] baseline. Source code is available at <https://github.com/KaiyangZhou/CoOp>.
- PatchCore [14] utilizes locally aggregated, mid-level patch features over a local neighborhood to ensure the retention of sufficient spatial context. PatchCore employs a memory bank for patch features to leverage nominal context at test time by using a greedy coreset subsampling. Results are taken from [2] baseline. Source code is available at <https://github.com/amazon-science/patchcore-inspection>
- WinCLIP [8] is a SOTA zero-shot anomaly detection method. Results for zero-shot settings are taken from the original publication and for few-shot settings are taken from [2] baseline. The authors design a large set of text prompt templates specific to anomaly detection and use a window scaling strategy to obtain anomaly segmentation. Source code is available at <https://github.com/caoyunkang/WinClip>.
- April-GAN [2] is an improved version of WinCLIP. We conducted experiments with this approach and all parameters are kept the same as in their paper. April-GAN first adjusts the text prompt templates and then introduces learnable linear projections to improve local visual semantics to derive more accurate segmentation. Source code is available at <https://github.com/ByChelsea/VAND-APRIL-GAN>.
- GraphCore [16] is a few-shot learning approach that utilizes memory banks to store image features. Results are taken from the original publication. They employ graph representation (Graph Neural Networks) to provide a visual isometric invariant feature (VIIF) as an anomaly measurement feature. The VIIF reduces the size of redundant features stored in memory banks. Results are taken from the original publication. The

authors have not provided a link to the source code yet.

- FastRecon [5] is a few-shot learning approach that utilizes a few normal samples as a reference to reconstruct its normal version, and sample alignment helps to detect anomalies. Thus, they propose a regression algorithm with distribution regularization for the transformation estimation. Results are taken from the original publication. Source code is available at <https://github.com/FzJun26th/FastRecon>.
- InCTRL [21] is a vision-language few-shot learning model that proposes an in-context residual learning approach. It aims to distinguish anomalies from normal samples by detecting residuals between test images and in-context few-shot normal sample prompts from the target domain on the fly. Results are taken from the original publication. Source code is available at <https://github.com/mala-lab/InCTRL>.
- PromptAD [12] is a vision-language few-shot learning approach that learns text prompts for anomaly detection. They propose to concatenate anomaly suffixes to transpose the semantics of normal prompts, in order to construct negative samples. They aim to control the distance between normal and abnormal prompt features through a hyperparameter. Results are taken from the original publication. Source code is available at <https://github.com/FuNz-0/PromptAD>.
- AnomalyCLIP [20] is a SOTA zero-shot anomaly detection method. Results are taken from the original publication. This approach learns a vector representation for text prompts for two states: normal and abnormal. They construct two templates of text prompts, object-aware text prompts and object-agnostic text prompts templates. Through an object-agnostic text prompt template, they aim to learn the shared patterns of different anomalies. Results are taken from the original publication. Source code is available at <https://github.com/zqhang/AnomalyCLIP>.

## 4. Experiments

In this section, we provide more details regarding our approach through ablation studies and the experiments that were conducted. We also visualize the results and discuss some insights and limitations of our approach.

### 4.1. Experiment Details

In this subsection, we detail the experimental setup. We use the ViT-L-14-336 CLIP backbone from OpenCLIP [7], pre-trained on the LAION-400M.E32 setting of open-clip. The learning rate is set to 0.001, with a batch size of 8. The stage number  $m = 4$ . The features are selected from layers 6, 12, 18, and 24.

We adopt a transfer learning setting, training the model on one dataset and evaluating it on the remaining. Specifically, we train our model on MVTec-AD and evaluate it on VisA, MPDD, MAD, and Real-IAD, as well as train on VisA and evaluate on MVTec-AD. Other combinations are not included in the results, as most baselines focus on the aforementioned configurations. During training, we exclude all images labeled with “combined” defects, which indicate multiple defects in a single image. This exclusion is due to the datasets providing binary anomaly masks that treat all defects as identical. Since combined defects are relatively rare in the datasets (see Tables 7, 8, 9), we opted to leave them out during training. However, for testing, all images with multiple defects are included to ensure a fair comparison.

### 4.2. Ablation Studies

Here, we will give more details regarding our ablation studies and show additional results of the experiments we have conducted for the multi-type anomaly segmentation (MTAS) task, binary zero-/few-shot anomaly detection task, and zero-batch task.

#### 4.2.1. Global Anomaly Score

To assess the impact of the global anomaly score on anomaly detection, we conducted ablation studies using our MultiADS model without the global anomaly score, referred to as MultiADS-L. As shown in Table 14, removing the global anomaly score leads to a noticeable performance drop in the zero-shot setting. However, the performance drop in the few-shot setting is minimal, likely because the additional information provided by the test data compensates for the absence of global context.

#### 4.2.2. Defect-Aware Text Prompts

To show the importance of the defect-aware text prompts, we conduct experiments on the MPDD dataset with our approach, MultiADS. First, we train our model on the MVTec-AD dataset, with defect-aware text prompts constructed for the MVTec-AD dataset. Then, during the testing phase, instead of using the defect-aware text prompts constructed for the MPDD dataset, we use defect-aware text prompts constructed for the



Table 14. Ablation study for testing without global anomaly score. MultiADS is our proposed method, while MultiADS-L is the ablated version without including the global anomaly score.

| Settings       | Training → Testing | Method     | Image-Level |             |             |
|----------------|--------------------|------------|-------------|-------------|-------------|
|                |                    |            | AUROC       | F1-max      | AP          |
| Zero-shot      | MVTec-AD → VisA    | MultiADS   | 83.6        | 80.3        | 86.9        |
|                |                    | MultiADS-L | 82.1 (+1.5) | 80.3 (+0.0) | 85.8 (+1.1) |
|                | MVTec-AD → MPDD    | MultiADS   | 78.3        | 79.2        | 78.4        |
|                |                    | MultiADS-L | 76.5 (+1.8) | 79 (+0.2)   | 78.1 (+0.3) |
| Few-shot (k=4) | MVTec-AD → VisA    | MultiADS   | 93.3        | 89.7        | 94.3        |
|                |                    | MultiADS-L | 93.8 (-0.5) | 89.6 (+0.1) | 94.5 (-0.2) |
|                | MVTec-AD → MPDD    | MultiADS   | 86          | 87.2        | 89.4        |
|                |                    | MultiADS-L | 85.6 (+0.4) | 86.8 (+0.4) | 89.3 (+0.1) |

Table 15. Ablation Study: Results for MultiADS for each product of the MPDD dataset with different defect-aware text prompts from the VisA dataset and the MPDD dataset on few-shot (k=1) anomaly detection and segmentation tasks. Our model is trained on the MVTec-AD dataset. (**Bold** represents the best performer)

| Setting       | k=1         |             |        |             |      |             |       |             |             |             |        |             |      |             |
|---------------|-------------|-------------|--------|-------------|------|-------------|-------|-------------|-------------|-------------|--------|-------------|------|-------------|
| MVTec → MPDD  | Pixel-Level |             |        |             |      |             |       |             | Image-Level |             |        |             |      |             |
| Product       | AUROC       |             | F1-max |             | AP   |             | AUPRO |             | AUROC       |             | F1-max |             | AP   |             |
|               | VisA        | MPDD        | VisA   | MPDD        | VisA | MPDD        | VisA  | MPDD        | VisA        | MPDD        | VisA   | MPDD        | VisA | MPDD        |
| Bracket_black | 96.7        | 97.2        | 11.2   | 18.7        | 4.5  | 11.8        | 88    | 89.5        | 63.4        | 74.6        | 78.5   | 81.6        | 68.6 | 80.8        |
| Bracket_brown | 96          | 96.2        | 14.9   | 17.6        | 7.5  | 8.7         | 91    | 91.1        | 60.4        | 53.3        | 80     | 79.7        | 72.5 | 71.4        |
| Bracket_white | 99.7        | 99.7        | 20.7   | 24.5        | 12.8 | 15.2        | 96.5  | 96.7        | 73.4        | 81.1        | 75     | 78.3        | 77   | 82.5        |
| Connector     | 95.9        | 96.4        | 35.3   | 33.9        | 33.7 | 32.4        | 87.2  | 87.8        | 92.9        | 91.4        | 78.8   | 82.8        | 88.9 | 9.3         |
| Metal_plate   | 96.3        | 96.3        | 74.6   | 73.1        | 81.2 | 74.8        | 90.6  | 89.8        | 99          | 92          | 97.9   | 90.1        | 99.6 | 97.2        |
| Tubes         | 98.7        | 98.8        | 69     | 68.7        | 71   | 70.4        | 95    | 95.5        | 97.3        | 97.6        | 96.4   | 95.5        | 99   | 99.1        |
| Average       | 97.2        | <b>97.4</b> | 37.6   | <b>39.4</b> | 35.1 | <b>35.6</b> | 91.4  | <b>91.7</b> | 81.1        | <b>81.7</b> | 84.4   | <b>84.6</b> | 84.3 | <b>86.7</b> |

VisA dataset. The results are shown in Table 15. We observe that our approach, MultiADS, performs quite well even when we utilize the defect-aware text prompts of the other dataset for all the metrics on pixel-level and image-level on few-shot anomaly detection and segmentation tasks. Also, we note that to achieve the best performance, especially on the image level, it is crucial to employ defect-aware text prompts suitable for the products of the testing dataset, the MPDD dataset.

In addition to the results shown in the main manuscript, in Table 16 we list the segmentation performance for some sample defect types that are seen/unseen during the training phase. We notice that defects such as *stains* and *scratches* are easy to locate and classify, as they also occur on the training dataset - MVTec-AD. For unseen defects like *burrs* and *mismatch*, our model achieves slightly lower accuracy. On the other hand, for other unseen defects such as *flattening*, we perform with high precision for the classification task. These results, similar to results in the main manuscript, reflect that our approach, MultiADS, has generalization ability on large and complex datasets and unseen defects in the training dataset.

Table 16. Results MTAS for zero-shot setting at pixel-level for sample defect-types. The model is trained on the MVTec-AD dataset. - indicates **unseen** defect types while ✓ indicates **seen** defect types during training.

| (a) MAD-sim |            |       |          |       |
|-------------|------------|-------|----------|-------|
|             | Defects    | AUROC | F1-Score | AP    |
| -           | Burrs      | 95.56 | 1.18     | 1.67  |
| ✓           | Missing    | 86.52 | 2.56     | 3.08  |
| ✓           | Stains     | 98.19 | 15.02    | 9.92  |
| (b) MPDD    |            |       |          |       |
|             | Defects    | AUROC | F1-Score | AP    |
| -           | Mismatch   | 88.44 | 2.56     | 1.04  |
| -           | Flattening | 96.72 | 36.06    | 8.33  |
| ✓           | Scratch    | 96.67 | 26.99    | 20.26 |

### 4.2.3. Batched Zero-shot Setting

The idea behind the batched zero-shot setting is to utilize all text samples in  $X_{\text{test}}$  without relying on any labels. This approach can be viewed as a form of domain adaptation, enabling the trained model to better align with the target domain. Inspired by the methodology proposed

Table 17. Image level results for batched zero-shot setting. All results are AUROC values (%). The numbers of baselines are taken from AnomalyDINO [3]. 448 and 672 are the resolutions of the input image.

| Setting           | Method                           | MVTec       | VisA        |
|-------------------|----------------------------------|-------------|-------------|
| Batched zero-shot | ACR [10]                         | 85.8        | /           |
|                   | MuSc [11]                        | <b>97.8</b> | 92.8        |
|                   | AnomalyDINO <sub>(448)</sub> [3] | 93.0        | 89.7        |
|                   | AnomalyDINO <sub>(672)</sub> [3] | 94.2        | 90.7        |
|                   | MultiADS (ours)                  | 96.1        | <b>93.1</b> |

by AnomalyDINO [3], we employ a memory bank to facilitate this adaptation process. For each test sample  $x^{(k)} \in X_{\text{test}}$ , let  $\mathbf{Z}_i^k \in \mathbb{R}^{h \times w \times N_z}$  denote the adapted image patch embeddings at state  $i$  for given image  $x^{(k)}$ . We define memory bank  $\mathcal{M}_i$  as the union of all image patch embeddings at stage  $i$  across the entire text set  $X_{\text{test}}$ :

$$\mathcal{M}_i = \bigcup_{x^{(k)} \in X_{\text{test}}} \{\mathbf{Z}_i^k[a, b] | a \in [h], b \in [w]\}. \quad (3)$$

During testing, for each given image  $x^{(k)}$ , we compute the cosine similarity between its adapted image patch embedding  $\mathbf{Z}_i^k[a, b] \in \mathbb{R}^{N_z}$  and all embeddings in the memory bank  $\mathcal{M}_i \setminus \{\mathbf{Z}_i^k[a, b]\}$ . Since the memory bank may include anomalous features (due to the unlabeled setting), directly selecting the nearest neighbor might not reliably represent nominal behavior. To address this, and based on the assumption that most patches in the memory bank are nominal, we replace the nearest neighbor with the  $k$ -th nearest neighbor, where  $k$  corresponds to the  $\alpha$ -quantile of the similarity scores. Thus, the set of cosine similarity scores is defined as follows:

$$\mathcal{D}(\mathbf{Z}_i^k[a, b], \mathcal{M}_i \setminus \{\mathbf{Z}_i^k[a, b]\}) = \{d(\mathbf{Z}_i^k[a, b], \mathbf{x}) \mid \mathbf{x} \in \mathcal{M}_i \setminus \{\mathbf{Z}_i^k[a, b]\}\}. \quad (4)$$

where  $d(\cdot)$  represents the cosine similarity. The reference anomaly score for image patch embedding  $\mathbf{Z}_i^k[a, b]$  is defined as follows:

$$s(\mathbf{Z}_i^k[a, b]) = q_\alpha(\mathcal{D}(\mathbf{Z}_i^k[a, b], \mathcal{M}_i \setminus \{\mathbf{Z}_i^k[a, b]\})), \quad (5)$$

where  $q_\alpha$  is the  $\alpha$  quantile of the similarity score set. The comparison of our MultiADS approach with other baselines is listed in Table 17.

#### 4.2.4. Backbones

In Table 18, we show the impact of different architectures and resolutions for our proposed approach, MultiADS. To evaluate the performance of our proposed

approach, MultiADS, and other baselines, we perform zero-shot and few-shot anomaly detection and segmentation on five datasets, MVTEC-AD [1], VisA [22], MPDD [9], MAD [19], and Real-IAD [15]. Results of other baselines are taken from the original published papers or the most recent publications. Thus, for some of the baselines, we are missing the evaluation with different metrics, such as F1-max, AP, and AUPRO on pixel-level, or F1-max and AP for image-level.

#### 4.2.5. Additional Results

In Tables 19, 20, and 21, we show results for our approach, MultiADS, and other baselines on a few-shot setting with  $k \in [1, 2, 4, 8]$  on anomaly detection and segmentation tasks on three datasets, VisA, MPDD, and MVTEC-AD, respectively. In Tables 22, 23, and 24, we show results for our approach, MultiADS, on a few-shot setting with  $k \in \{1, 2\}$  on anomaly detection and segmentation tasks for each product of the VisA, MPDD, and MVTEC-AD datasets, respectively. In Tables 25 and 26, we show results for the variant of our approach, MultiADS-F, on the few-shot setting with  $k \in \{1, 2\}$  on anomaly detection and segmentation tasks for each product of the VisA and MPDD datasets, respectively.

Furthermore, in Table 27, we show results for our proposal, MultiADS, and the most recent baseline, AdaCLIP, for all products of the Real-IAD dataset. We note that our proposal outperforms AdaCLIP for all metrics, and the largest improvement of our method is at the image level. Similarly, in Table 28, we show results for our proposal, MultiADS, and the most competitive baseline, April-GAN, for all products of the MAD dataset. We note that our proposal overall outperforms April-GAN for almost all metrics, and the largest improvement of our method is at the pixel level.

#### 4.3. Visualizations

In this subsection, we present additional visualizations of our anomaly segmentation results. We include eight examples of products from the MVTEC-AD, VisA, and MPDD datasets: hazelnut (Figure 1), screw (Figure 2), and leather (Figure 3) from MVTEC-AD; pipe\_fryum (Figure 4), and capsule (Figure 5) from VisA; and connector (Figure 6) and tube (Figure 7) from MPDD. All segmentation visualizations are performed in a few-shot ( $k = 4$ ) setting. Specifically, the models for hazelnut, screw, and leather were trained on the VisA dataset; the models for pipe\_fryum, capsule, and candle were trained on the MVTEC-AD dataset; and the models for connector and tube were trained on the MVTEC-AD dataset. We discuss some insights and limitations in the caption of these figures.

Table 18. Ablation study for training and testing with different architectures/resolutions for BADS. MultiADS applies the ViT-L-14 architecture with a resolution of 336.

| Settings       | Dataset | Architecture | Resolution | Image-Level |        |      |
|----------------|---------|--------------|------------|-------------|--------|------|
|                |         |              |            | AUROC       | F1-max | AP   |
| Zero-shot      | VisA    | ViT-B-16     | 224        | 74          | 76.6   | 79   |
|                |         | ViT-B-32     | 224        | 68.4        | 74.6   | 73.5 |
|                |         | ViT-L-14     | 224        | 75.2        | 78.4   | 80.6 |
|                |         | ViT-L-14     | 336        | 83.6        | 80.3   | 86.9 |
|                | MPDD    | ViT-B-16     | 224        | 67.7        | 77.2   | 74.4 |
|                |         | ViT-B-32     | 224        | 60.7        | 75     | 68.8 |
|                |         | ViT-L-14     | 224        | 71.6        | 77.8   | 76.8 |
|                |         | ViT-L-14     | 336        | 78.3        | 79.2   | 78.4 |
| Few-shot (k=4) | VisA    | ViT-B-16     | 224        | 90          | 86     | 91.9 |
|                |         | ViT-B-32     | 224        | 83.1        | 81.4   | 85.4 |
|                |         | ViT-L-14     | 224        | 92          | 88     | 93.5 |
|                |         | ViT-L-14     | 336        | 93.3        | 89.7   | 94.3 |
|                | MPDD    | ViT-B-16     | 224        | 80.2        | 81.6   | 80   |
|                |         | ViT-B-32     | 224        | 78.2        | 83.1   | 80.2 |
|                |         | ViT-L-14     | 224        | 82          | 82.9   | 84.3 |
|                |         | ViT-L-14     | 336        | 85.6        | 87.2   | 89.4 |

Table 19. Few-shot anomaly detection and segmentation on the VisA Datasets. April-GAN baseline and our model are trained on the MVTEC-AD dataset. (- denotes the results for this metric are not reported in the original paper; **bold** represents the best performer)

| Settings          |        | k=1         |             |             |             |             | k=2         |             |             |             |             |
|-------------------|--------|-------------|-------------|-------------|-------------|-------------|-------------|-------------|-------------|-------------|-------------|
| VisA              |        | Pixel-Level |             | Image-Level |             |             | Pixel-Level |             | Image-Level |             |             |
| Method            | Venue  | AUROC       | AUPRO       | AUROC       | F1-max      | AP          | AUROC       | AUPRO       | AUROC       | F1-max      | AP          |
| PaDiM             | ICPR21 | 89.9        | 64.3        | 62.8        | 75.3        | 68.3        | 92.0        | 70.1        | 67.4        | 75.7        | 71.6        |
| CoOp              | IJCV22 | -           | -           | -           | -           | -           | -           | -           | 83.5        | -           | -           |
| PatchCore         | CVPR23 | 95.4        | 80.5        | 79.9        | 81.7        | 82.8        | 96.1        | 82.6        | 81.6        | 82.5        | 84.8        |
| WinCLIP           | CVPR23 | 96.4        | 85.1        | 83.8        | 83.1        | 85.1        | 96.8        | 86.2        | 84.6        | 83.0        | 85.8        |
| April-GAN         | CVPR23 | 96.0        | 90.0        | 91.2        | 86.9        | 93.3        | 96.2        | 90.1        | 92.2        | 87.7        | 94.2        |
| PromptAD          | CVPR24 | 96.7        | -           | 86.9        | -           | -           | 97.1        | -           | 88.3        | -           | -           |
| InCTRL            | CVPR24 | -           | -           | -           | -           | -           | -           | -           | 87.7        | -           | -           |
| AnomalyGPT        | AAAI24 | 96.2        | -           | 87.4        | -           | -           | 96.4        | -           | 88.6        | -           | -           |
| MultiADS (ours)   |        | <b>97.1</b> | <b>92.7</b> | 91.9        | <b>88.3</b> | 93.1        | <b>97.2</b> | <b>93.1</b> | <b>93.3</b> | <b>89.5</b> | 93.9        |
| MultiADS-F (ours) |        | 96.6        | 91.7        | <b>92</b>   | 88.1        | <b>93.9</b> | 96.7        | 91.9        | 92.8        | 88.5        | <b>94.4</b> |

  

| Settings          |        | k=4         |             |             |             |             | k=8         |             |             |             |             |
|-------------------|--------|-------------|-------------|-------------|-------------|-------------|-------------|-------------|-------------|-------------|-------------|
| VisA              |        | Pixel-Level |             | Image-Level |             |             | Pixel-Level |             | Image-Level |             |             |
| Method            | Venue  | AUROC       | AUPRO       | AUROC       | F1-max      | AP          | AUROC       | AUPRO       | AUROC       | F1-max      | AP          |
| PaDiM             | ICPR21 | 93.2        | 72.6        | 72.8        | 78.0        | 75.6        | -           | -           | 78.1        | -           | -           |
| CoOp              | IJCV22 | -           | -           | 84.2*       | -           | -           | -           | -           | 84.8        | -           | -           |
| PatchCore         | CVPR23 | 96.8        | 84.9        | 85.3        | 84.3        | 87.5        | -           | -           | 87.3        | -           | -           |
| WinCLIP           | CVPR23 | 97.2        | 87.6        | 87.3        | 84.2        | 88.8        | -           | -           | 88.0        | -           | -           |
| April-GAN         | CVPR23 | 96.2        | 90.2        | 92.6        | 88.4        | 94.5        | 96.3        | 90.2        | 92.7        | 88.5        | 94.6        |
| PromptAD          | CVPR24 | <b>97.4</b> | -           | 89.1        | -           | -           | -           | -           | -           | -           | -           |
| InCTRL            | CVPR24 | -           | -           | 90.2*       | -           | -           | -           | -           | 90.4        | -           | -           |
| AnomalyGPT        | AAAI24 | 96.7        | -           | 90.6        | -           | -           | -           | -           | -           | -           | -           |
| MultiADS (ours)   |        | 96.9        | 91.1        | <b>93.3</b> | <b>89.7</b> | 94.3        | <b>97.4</b> | <b>93.5</b> | <b>94.7</b> | <b>91.3</b> | 94.9        |
| MultiADS-F (ours) |        | 97.0        | <b>91.5</b> | 92.8        | 88.5        | <b>94.6</b> | 96.9        | 92.1        | 93.8        | 89.5        | <b>95.1</b> |

Table 20. Few-shot anomaly detection and segmentation on the MPDD Dataset. April-GAN baseline and our model are trained on the MVTec-AD dataset. (- denotes the results for this metric are not reported in the original paper; **bold** represents the best performer)

| Settings          |        | k=1         |             |             |             |             | k=2         |             |             |             |             |
|-------------------|--------|-------------|-------------|-------------|-------------|-------------|-------------|-------------|-------------|-------------|-------------|
| MPDD              |        | Pixel-Level |             | Image-Level |             |             | Pixel-Level |             | Image-Level |             |             |
| Method            | Venue  | AUROC       | AUPRO       | AUROC       | F1-max      | AP          | AUROC       | AUPRO       | AUROC       | F1-max      | AP          |
| PaDiM             | ICPR21 | 73.9        | -           | 57.5        | -           | -           | 75.4        | -           | 58.0        | -           | -           |
| RegAD             | ECCV22 | 92.6        | -           | 60.9        | -           | -           | 93.2        | -           | 63.4        | -           | -           |
| PatchCore         | CVPR22 | 79.4        | -           | 68.9        | 77.2        | -           | 84.4        | -           | 75.5        | 81.7        | -           |
| April-GAN         | CVPR23 | 96.9        | 91.4        | 84.6        | <b>86.8</b> | <b>88.6</b> | 96.9        | 91.4        | 84.6        | <b>86.8</b> | 88.6        |
| GraphCore         | ICLR23 | 95.2        | -           | <b>84.7</b> | -           | -           | 95.4        | -           | 85.4        | -           | -           |
| FastRecon         | ICCV23 | 96.4        | -           | 72.2        | 79.1        | -           | 96.7        | -           | 76.1        | 82.8        | -           |
| MultiADS (ours)   |        | 97.4        | 91.7        | 81.7        | 84.6        | 86.7        | 97.7        | <b>92.4</b> | <b>86.6</b> | 86.6        | <b>90.1</b> |
| MultiADS-F (ours) |        | <b>97.7</b> | <b>92.2</b> | 80.1        | 82.5        | 84          | <b>97.8</b> | <b>92.4</b> | 83.8        | 85.8        | 86.9        |

  

| Settings          |        | k=4         |             |             |             |             | k=8         |             |             |             |             |
|-------------------|--------|-------------|-------------|-------------|-------------|-------------|-------------|-------------|-------------|-------------|-------------|
| MPDD              |        | Pixel-Level |             | Image-Level |             |             | Pixel-Level |             | Image-Level |             |             |
| Method            | Venue  | AUROC       | AUPRO       | AUROC       | F1-max      | AP          | AUROC       | AUPRO       | AUROC       | F1-max      | AP          |
| PaDiM             | ICPR21 | 75.9        | -           | 58.3        | -           | -           | 76.2        | -           | 58.5        | -           | -           |
| RegAD             | ECCV22 | 93.9        | -           | 68.8        | -           | -           | 95.1        | -           | 71.9        | -           | -           |
| PatchCore         | CVPR22 | 92.8        | -           | 77.8        | 82.4        | -           | 92.8        | -           | 77.8        | 82.4        | -           |
| April-GAN         | CVPR23 | 96.9        | 91.4        | 84.6        | 86.8        | 88.6        | 96.7        | 91          | 86          | <b>87.8</b> | <b>90.8</b> |
| GraphCore         | ICLR23 | 95.7        | -           | 85.7        | -           | -           | 95.9        | -           | 86.0        | -           | -           |
| FastRecon         | ICCV23 | 97.2        | -           | 79.3        | 83.5        | -           | 97.2        | -           | 79.3        | 83.5        | -           |
| MultiADS (ours)   |        | 97.5        | 94.1        | 84.3        | 84.8        | 87.2        | 97.7        | <b>93.1</b> | 83.3        | 87.6        | 88.1        |
| MultiADS-F (ours) |        | <b>97.8</b> | <b>94.4</b> | 86.2        | <b>88.5</b> | <b>88.8</b> | <b>98</b>   | 92.8        | 85          | 85.2        | 89.1        |

Table 21. Few-shot anomaly detection and segmentation on the MVTec-AD Dataset. April-GAN baseline and our model are trained on the VisA dataset. (- denotes the results for this metric are not reported in the original paper; **bold** represents the best performer)

| Settings        |        | k=1         |             |             |           |             | k=2         |             |             |             |             |
|-----------------|--------|-------------|-------------|-------------|-----------|-------------|-------------|-------------|-------------|-------------|-------------|
| MVTec-AD        |        | Pixel-Level |             | Image-Level |           |             | Pixel-Level |             | Image-Level |             |             |
| Method          | Venue  | AUROC       | AUPRO       | AUROC       | F1-max    | AP          | AUROC       | AUPRO       | AUROC       | F1-max      | AP          |
| PaDiM           | ICPR21 | 89.9        | 64.3        | 62.8        | 75.3      | 68.3        | 92.0        | 70.1        | 67.4        | 75.7        | 71.6        |
| PatchCore       | CVPR23 | 95.4        | 80.5        | 79.9        | 81.7      | 82.8        | 96.1        | 82.6        | 81.6        | 82.5        | 84.8        |
| WinCLIP         | CVPR23 | <b>96.4</b> | 85.1        | 83.8        | 83.1      | 85.1        | <b>96.8</b> | 86.2        | 84.6        | 83.0        | 85.8        |
| April-GAN       | CVPR23 | 96.0        | 90.0        | 91.2        | 86.9      | 93.3        | 96.2        | 90.1        | 92.2        | 87.7        | 94.2        |
| PromptAD        | CVPR24 | 96.7        | -           | 86.9        | -         | -           | 97.1        | -           | 88.3        | -           | -           |
| AnomalyGPT      | AAAI24 | 96.2        | -           | 87.4        | -         | -           | 96.4        | -           | 88.6        | -           | -           |
| MultiADS (ours) |        | 93.2        | <b>90.6</b> | <b>93</b>   | <b>94</b> | <b>96.4</b> | 93.2        | <b>90.8</b> | <b>93.5</b> | <b>94.5</b> | <b>96.6</b> |

  

| Settings        |        | k=4         |             |             |             |             | k=8         |             |             |           |             |
|-----------------|--------|-------------|-------------|-------------|-------------|-------------|-------------|-------------|-------------|-----------|-------------|
| MVTec-AD        |        | Pixel-Level |             | Image-Level |             |             | Pixel-Level |             | Image-Level |           |             |
| Method          | Venue  | AUROC       | AUPRO       | AUROC       | F1-max      | AP          | AUROC       | AUPRO       | AUROC       | F1-max    | AP          |
| PaDiM           | ICPR21 | 93.2        | 72.6        | 72.8        | 78.0        | 75.6        | -           | -           | -           | -         | -           |
| PatchCore       | CVPR23 | 96.8        | 84.9        | 85.3        | 84.3        | 87.5        | -           | -           | -           | -         | -           |
| WinCLIP         | CVPR23 | 97.2        | 87.6        | 87.3        | 84.2        | 88.8        | -           | -           | -           | -         | -           |
| April-GAN       | CVPR23 | 95.9        | <b>91.8</b> | 92.8        | 92.8        | 96.3        | <b>96.1</b> | <b>92.2</b> | 93.3        | 93.1      | 96.5        |
| PromptAD        | CVPR24 | <b>97.4</b> | -           | 89.1        | -           | -           | -           | -           | -           | -         | -           |
| AnomalyGPT      | AAAI24 | 96.7        | -           | 90.6        | -           | -           | -           | -           | -           | -         | -           |
| MultiADS (ours) |        | 93.3        | 90.9        | <b>96.6</b> | <b>95.4</b> | <b>98.1</b> | 93.4        | 91.2        | <b>97.2</b> | <b>96</b> | <b>98.5</b> |

Table 22. Results for MultiADS for each product of the VisA dataset on few-shot anomaly detection and segmentation tasks. Our model is trained on the MVTec-AD dataset.

| Settings   | k=1         |        |      |       |             |        |      | k=2         |        |      |       |             |        |      |
|------------|-------------|--------|------|-------|-------------|--------|------|-------------|--------|------|-------|-------------|--------|------|
| VisA       | Pixel-Level |        |      |       | Image-Level |        |      | Pixel-Level |        |      |       | Image-Level |        |      |
| Product    | AUROC       | F1-max | AP   | AUPRO | AUROC       | F1-max | AP   | AUROC       | F1-max | AP   | AUPRO | AUROC       | F1-max | AP   |
| Candle     | 98.7        | 39.7   | 25.2 | 97    | 91.2        | 88.1   | 90.8 | 98.7        | 39.3   | 24.7 | 97.1  | 92          | 88.8   | 91   |
| Capsules   | 98.1        | 47.1   | 39.9 | 90.7  | 95.4        | 92.1   | 97.6 | 98.3        | 48.8   | 44.2 | 92.9  | 96.5        | 92.5   | 98.1 |
| Cashew     | 94.6        | 49.3   | 41.8 | 96.3  | 91          | 89.7   | 95.5 | 94.3        | 49.5   | 41.4 | 96.5  | 95          | 92.2   | 97.6 |
| Chewinggum | 99.7        | 72.4   | 76.1 | 95.1  | 98.4        | 97     | 99.4 | 99.6        | 71.1   | 73.6 | 94.7  | 98.4        | 96.4   | 99.3 |
| Fryum      | 95          | 35.4   | 29.8 | 93    | 96.6        | 92.9   | 98.3 | 95.1        | 36.7   | 30.7 | 93.3  | 97.3        | 95.9   | 98.9 |
| Macaroni1  | 99.5        | 33.6   | 26.2 | 95.6  | 90.8        | 84     | 92.9 | 99.5        | 30.1   | 22.8 | 96.1  | 90.6        | 83.7   | 92.3 |
| Macaroni2  | 98.7        | 26.8   | 14.1 | 90.4  | 85.8        | 80.2   | 89.2 | 98.8        | 23.8   | 12.5 | 89.6  | 83          | 75.6   | 85.6 |
| Pcb1       | 96.6        | 36.1   | 29.9 | 93.2  | 94.9        | 90.6   | 94.1 | 97          | 42.5   | 36.2 | 93.5  | 93.5        | 88.6   | 92.3 |
| Pcb2       | 95.4        | 27.4   | 19.1 | 84.7  | 77.4        | 72.7   | 78.5 | 95.6        | 35.9   | 24.9 | 86.3  | 87.5        | 82.7   | 87.4 |
| Pcb3       | 93.8        | 42.9   | 32.4 | 86.5  | 86.4        | 81.3   | 87.4 | 94.1        | 50.1   | 39.8 | 87.3  | 90.9        | 84     | 91.2 |
| Pcb4       | 96.6        | 38.3   | 34   | 91.9  | 96.4        | 93.8   | 94.5 | 96.7        | 39.6   | 34.3 | 92.1  | 96.1        | 93.7   | 93.3 |
| Pipe_fryum | 98.1        | 50.1   | 40.8 | 97.8  | 98.9        | 97.5   | 99.3 | 98.1        | 51.1   | 41   | 97.9  | 99          | 99.5   | 99.3 |
| Average    | 97.1        | 41.6   | 34.1 | 92.7  | 91.9        | 88.3   | 93.1 | 97.2        | 43.2   | 35.5 | 93.1  | 93.3        | 89.5   | 93.9 |

Table 23. Results for MultiADS for each product of the MPDD dataset on few-shot anomaly detection and segmentation tasks. Our model is trained on the MVTec-AD dataset.

| Settings      | k=1         |        |      |       |             |        |      | k=2         |        |      |       |             |        |      |
|---------------|-------------|--------|------|-------|-------------|--------|------|-------------|--------|------|-------|-------------|--------|------|
| MPDD          | Pixel-Level |        |      |       | Image-Level |        |      | Pixel-Level |        |      |       | Image-Level |        |      |
| Product       | AUROC       | F1-max | AP   | AUPRO | AUROC       | F1-max | AP   | AUROC       | F1-max | AP   | AUPRO | AUROC       | F1-max | AP   |
| Bracket_black | 97.2        | 18.7   | 11.8 | 89.5  | 74.6        | 81.6   | 80.8 | 98.3        | 35     | 25.3 | 94.3  | 82.4        | 82.1   | 88.9 |
| Bracket_brown | 96.2        | 17.6   | 8.7  | 91.1  | 53.3        | 79.7   | 71.4 | 96.2        | 19.9   | 11.1 | 90.1  | 65.8        | 81     | 78.1 |
| Bracket_white | 99.7        | 24.5   | 15.2 | 96.7  | 81.1        | 78.3   | 82.5 | 99.6        | 23.7   | 14.1 | 96.2  | 84.1        | 81.1   | 85   |
| Connector     | 96.4        | 33.9   | 32.4 | 87.8  | 91.4        | 82.8   | 89.3 | 96.2        | 35.1   | 34.3 | 87.7  | 93.8        | 85.7   | 91   |
| Metal_plate   | 96.3        | 73.1   | 74.8 | 89.8  | 92          | 90.1   | 97.2 | 96.8        | 75     | 77.8 | 90.7  | 95.7        | 93.7   | 98.5 |
| Tubes         | 98.8        | 68.7   | 70.4 | 95.5  | 97.6        | 95.5   | 99.1 | 98.8        | 69.2   | 71.2 | 95.7  | 97.9        | 96.3   | 99.2 |
| Average       | 97.4        | 39.4   | 35.6 | 91.7  | 81.7        | 84.6   | 86.7 | 97.7        | 43     | 39   | 92.4  | 86.6        | 86.6   | 90.1 |

Table 24. Results for MultiADS for each product of the MVTec-AD dataset on few-shot anomaly detection and segmentation tasks. Our model is trained on the VisA dataset.

| Settings   | k=1         |        |      |       |             |        |      | k=2         |        |      |       |             |        |      |
|------------|-------------|--------|------|-------|-------------|--------|------|-------------|--------|------|-------|-------------|--------|------|
| MVTec-AD   | Pixel-Level |        |      |       | Image-Level |        |      | Pixel-Level |        |      |       | Image-Level |        |      |
| Product    | AUROC       | F1-max | AP   | AUPRO | AUROC       | F1-max | AP   | AUROC       | F1-max | AP   | AUPRO | AUROC       | F1-max | AP   |
| Bottle     | 93.3        | 63.2   | 66.9 | 89.3  | 97.2        | 96.7   | 99.2 | 93.4        | 63.6   | 67.3 | 89.3  | 96.9        | 96.7   | 99.1 |
| Cable      | 84.8        | 37.3   | 34.1 | 81    | 82.7        | 80.8   | 90.3 | 83.8        | 39.8   | 35.1 | 80.6  | 84.6        | 82.2   | 91   |
| Capsule    | 95.3        | 36.6   | 31.1 | 93.6  | 73.6        | 93.4   | 91.6 | 95.4        | 36.7   | 30.6 | 94    | 72.9        | 93     | 91.4 |
| Carpet     | 99.1        | 73.1   | 78   | 97.3  | 99.7        | 98.3   | 99.9 | 99.1        | 72.9   | 77.6 | 97.6  | 99.8        | 98.9   | 99.9 |
| Grid       | 98.3        | 45.3   | 40.7 | 94.5  | 95.8        | 96.5   | 98.1 | 98.6        | 45.6   | 42.6 | 95.1  | 97.7        | 97.4   | 98.9 |
| Hazelnut   | 98          | 61     | 63.9 | 96    | 99.8        | 99.3   | 99.9 | 98.2        | 63.1   | 66.4 | 96.2  | 98.9        | 97.9   | 99.3 |
| Leather    | 99.6        | 59.3   | 60.8 | 99.2  | 98.9        | 99.5   | 99.6 | 99.6        | 59.1   | 61   | 99.2  | 100         | 100    | 100  |
| Metal_nut  | 83.8        | 40.9   | 43.6 | 85.5  | 97.1        | 96.8   | 99.3 | 83.8        | 41.5   | 45   | 85.8  | 99.7        | 98.4   | 99.9 |
| Pill       | 88.8        | 40.4   | 38.6 | 96.3  | 96.4        | 96.9   | 99.2 | 88.6        | 40.3   | 38.2 | 96.3  | 95.5        | 97.2   | 99   |
| Screw      | 98          | 34.7   | 28.6 | 93.3  | 78.8        | 87.5   | 91.2 | 98          | 35.5   | 31.1 | 93.3  | 76.9        | 86.5   | 91.3 |
| Tile       | 95.2        | 69.6   | 64   | 91.7  | 98          | 96.4   | 99.2 | 95.2        | 69.6   | 64.1 | 91.4  | 98.4        | 97     | 99.3 |
| Toothbrush | 98.1        | 59.2   | 56   | 95.6  | 99.7        | 98.4   | 99.9 | 98          | 58.7   | 56.4 | 95.5  | 99.7        | 98.4   | 99.9 |
| Transistor | 71.4        | 25     | 22.9 | 59.1  | 82.8        | 75.4   | 80.1 | 72.4        | 27.1   | 24.5 | 59.8  | 85          | 78.6   | 81.2 |
| Wood       | 96.4        | 67.9   | 68.8 | 95.7  | 99.1        | 97.4   | 99.7 | 96.5        | 68.1   | 69.3 | 95.8  | 99.3        | 97.5   | 99.8 |
| Zipper     | 97.2        | 63.8   | 63.1 | 91.2  | 95.9        | 96.3   | 98.8 | 97.3        | 64.8   | 64   | 91.4  | 97.4        | 97.1   | 99.3 |
| Average    | 93.2        | 51.8   | 50.7 | 90.6  | 93          | 94     | 96.4 | 93.2        | 52.4   | 51.5 | 90.8  | 93.5        | 94.5   | 96.6 |

Table 25. Results for MultiADS-F for each product of the VisA dataset on few-shot anomaly detection and segmentation tasks. Our model is trained on the MVTec-AD dataset.

| Settings   | k=1         |        |      |       |             |        |      | k=2         |        |      |       |             |        |      |
|------------|-------------|--------|------|-------|-------------|--------|------|-------------|--------|------|-------|-------------|--------|------|
| VisA       | Pixel-Level |        |      |       | Image-Level |        |      | Pixel-Level |        |      |       | Image-Level |        |      |
| Product    | AUROC       | F1-max | AP   | AUPRO | AUROC       | F1-max | AP   | AUROC       | F1-max | AP   | AUPRO | AUROC       | F1-max | AP   |
| Candle     | 98.7        | 40.4   | 27.1 | 97.1  | 90.4        | 84.4   | 91   | 98.7        | 40     | 26.7 | 97    | 90.6        | 85.7   | 91.1 |
| Capsules   | 97.6        | 47.2   | 40.6 | 88.1  | 93.1        | 91.1   | 96.6 | 97.7        | 48.2   | 42.3 | 89.6  | 93.8        | 89.7   | 96.8 |
| Cashew     | 94.1        | 39.4   | 32.1 | 96.6  | 91.7        | 89.2   | 95.7 | 93.9        | 39.9   | 31.6 | 96.6  | 94.3        | 91.3   | 97.3 |
| Chewinggum | 99.6        | 77.6   | 82.2 | 93.1  | 98.9        | 97.4   | 99.5 | 99.6        | 77.4   | 81.9 | 93.1  | 98.3        | 97.4   | 99.3 |
| Fryum      | 94.3        | 33.3   | 27   | 92    | 93.8        | 93.3   | 97.4 | 94.4        | 34.1   | 27.5 | 92.3  | 94.7        | 93.8   | 98   |
| Macaroni1  | 99.5        | 35.7   | 26   | 96.2  | 89.1        | 82.4   | 91.7 | 99.5        | 35     | 24.5 | 96.4  | 90.3        | 82.4   | 92.5 |
| Macaroni2  | 98.8        | 26.8   | 14.3 | 89.8  | 84.3        | 77.9   | 88.7 | 98.8        | 25.5   | 13.7 | 89.3  | 82.8        | 77.2   | 86.3 |
| Pcb1       | 95.2        | 23.2   | 17.3 | 92    | 95.8        | 89.3   | 96.2 | 95.7        | 25     | 19.1 | 92.3  | 94.9        | 87.1   | 95.4 |
| Pcb2       | 94.4        | 31     | 21.6 | 82.3  | 83.7        | 78.8   | 85.7 | 94.5        | 35     | 24.4 | 83.3  | 87.9        | 80.4   | 90.2 |
| Pcb3       | 93.5        | 39.9   | 29.9 | 83.6  | 86.1        | 80.4   | 88   | 93.7        | 46.1   | 35.5 | 84    | 89.6        | 83     | 90.5 |
| Pcb4       | 96.5        | 39.7   | 35.1 | 91.6  | 97.5        | 94.1   | 96.7 | 96.5        | 40.5   | 35.4 | 91.6  | 97.4        | 94.2   | 96.5 |
| Pipe_fryum | 97.4        | 43.4   | 34.3 | 97.7  | 99.1        | 99     | 99.4 | 97.4        | 43     | 33.9 | 97.6  | 99          | 99.5   | 99.3 |
| Average    | 96.6        | 39.8   | 32.3 | 91.7  | 92          | 88.1   | 93.9 | 96.7        | 40.8   | 33   | 91.9  | 92.8        | 88.5   | 94.4 |

Table 26. Results for MultiADS-F for each product of the MPDD dataset on few-shot anomaly detection and segmentation tasks. Our model is trained on the MVTec-AD dataset.

| Settings      | k=1         |        |      |       |             |        |      | k=2         |        |      |       |             |        |      |
|---------------|-------------|--------|------|-------|-------------|--------|------|-------------|--------|------|-------|-------------|--------|------|
| MPDD          | Pixel-Level |        |      |       | Image-Level |        |      | Pixel-Level |        |      |       | Image-Level |        |      |
| Product       | AUROC       | F1-max | AP   | AUPRO | AUROC       | F1-max | AP   | AUROC       | F1-max | AP   | AUPRO | AUROC       | F1-max | AP   |
| Bracket_black | 97.6        | 25     | 18.2 | 91.8  | 73.1        | 77.1   | 82.8 | 98.1        | 32.1   | 23.7 | 94.1  | 78.6        | 81.1   | 86.2 |
| Bracket_brown | 95.9        | 18.5   | 9.8  | 88.9  | 54.6        | 79.7   | 74.4 | 95.9        | 21.1   | 13.4 | 87.9  | 65.4        | 81     | 80.6 |
| Bracket_white | 99.6        | 22.2   | 14.1 | 95.8  | 74.6        | 78.9   | 69.8 | 99.6        | 22.4   | 12.8 | 95.4  | 75.4        | 81.1   | 70.4 |
| Connector     | 96.3        | 30.8   | 27.3 | 87.3  | 84.8        | 70.6   | 79.8 | 96          | 31.8   | 28.6 | 86.9  | 89          | 82.8   | 86.7 |
| Metal_plate   | 97.6        | 80.4   | 78.3 | 93.2  | 98.4        | 97.3   | 99.4 | 98.1        | 82.5   | 81.4 | 94.2  | 98.9        | 97.3   | 99.6 |
| Tubes         | 99          | 65.6   | 68.9 | 96    | 95.4        | 91.5   | 98.1 | 99          | 66.2   | 69.5 | 96.2  | 95.3        | 91.4   | 98   |
| Average       | 97.7        | 40.4   | 36.1 | 92.2  | 80.1        | 82.5   | 84   | 97.8        | 42.7   | 38.2 | 92.4  | 83.8        | 85.8   | 86.9 |

Table 27. Results for MultiADS and the most recent baseline approach, AdaCLIP, for each product of the Real-IAD dataset on few-shot (k=4) anomaly detection and segmentation tasks. Both models are trained on the MVTec-AD dataset.

| Baseline          | MultiADS    |        |      |       |             |        | AdaCLIP |             |        |       |       |             |        |       |
|-------------------|-------------|--------|------|-------|-------------|--------|---------|-------------|--------|-------|-------|-------------|--------|-------|
| Real-IAD          | Pixel-Level |        |      |       | Image-Level |        |         | Pixel-Level |        |       |       | Image-Level |        |       |
| Product           | AUROC       | F1-max | AP   | AUPRO | AUROC       | F1-max | AP      | AUROC       | F1-max | AP    | AUPRO | AUROC       | F1-max | AP    |
| Audiojack         | 98.4        | 54.6   | 49.9 | 89.3  | 75.8        | 72.8   | 77.8    | 97.21       | 42.47  | 37.46 | -     | 66.2        | 53.68  | 57.39 |
| Bottle Cap        | 99          | 41.5   | 34.9 | 92    | 81          | 71.5   | 81.3    | 98.4        | 34.8   | 30.06 | -     | 86.84       | 76.87  | 80.65 |
| Button Battery    | 97.5        | 47.7   | 46.7 | 89.3  | 72.9        | 75.4   | 82      | 96.69       | 45.7   | 45.98 | -     | 69.47       | 74.45  | 78.94 |
| End Cap           | 96          | 30.6   | 21.7 | 86.8  | 77.3        | 76.8   | 84.4    | 90.59       | 17.74  | 7.89  | -     | 60.45       | 74.85  | 67.59 |
| Eraser            | 99.8        | 62.2   | 63.8 | 98.6  | 92.2        | 86.2   | 92.5    | 99.09       | 59.5   | 59.52 | -     | 71.49       | 60.43  | 67.37 |
| Fire hood         | 99.5        | 57.2   | 58.6 | 97.8  | 94.1        | 81.5   | 87.5    | 99.36       | 51.82  | 54    | -     | 87.76       | 72.36  | 73.05 |
| Mint              | 97.2        | 44     | 36.5 | 76    | 67.9        | 74.7   | 79.1    | 94.16       | 41.09  | 34.41 | -     | 64.47       | 74.69  | 75.19 |
| Mounts            | 99.8        | 60.7   | 58.6 | 99.3  | 91.3        | 87     | 78.6    | 99.68       | 58.08  | 58.96 | -     | 85.31       | 75.75  | 77.96 |
| Pcb               | 97.5        | 43.1   | 37.5 | 89.2  | 81.7        | 79.6   | 89.5    | 96.13       | 29.74  | 24.58 | -     | 77.41       | 78.7   | 85.46 |
| Phone Battery     | 99.4        | 61.8   | 61.2 | 95.3  | 90.5        | 85.6   | 92.7    | 97.51       | 58.98  | 57.42 | -     | 61.29       | 63.37  | 65.15 |
| Plastic Nut       | 98.8        | 37     | 37.1 | 93.5  | 85.9        | 60.1   | 65.7    | 97.1        | 37.57  | 38.56 | -     | 81.14       | 53.85  | 58.51 |
| Plastic Plug      | 99.1        | 47.8   | 40.4 | 96.3  | 79.5        | 70.2   | 80.7    | 95.23       | 46.29  | 39.14 | -     | 73.36       | 64.37  | 70.65 |
| Porcelain Doll    | 99.8        | 45.8   | 45.4 | 99    | 95.2        | 86.2   | 92.7    | 91.65       | 42.4   | 34.37 | -     | 63.37       | 52.36  | 50.13 |
| Regulator         | 96.6        | 38.7   | 29.7 | 78.4  | 78.1        | 51.1   | 55.4    | 88.1        | 3.34   | 1.91  | -     | 42.27       | 21.92  | 11.48 |
| Rolled Strip Base | 99.7        | 68.2   | 63.4 | 99    | 99          | 97.5   | 99.5    | 98.83       | 48.42  | 44.04 | -     | 65.33       | 80.32  | 80.01 |
| Sim Card Set      | 99.8        | 68.7   | 72.6 | 98.4  | 97.3        | 94     | 97.8    | 99.72       | 66.37  | 71.28 | -     | 83.06       | 79.91  | 86.61 |
| Switch            | 92.8        | 24.5   | 19.2 | 86.3  | 80.3        | 81.6   | 89      | 83.55       | 21.81  | 15.82 | -     | 82.29       | 82.49  | 89.5  |
| Tape              | 99.8        | 58.8   | 57.5 | 99.4  | 98.4        | 92.8   | 97.9    | 98.6        | 48.59  | 46.93 | -     | 96.95       | 89.64  | 95.18 |
| Terminalblock     | 99          | 65.2   | 60.7 | 96.7  | 92.8        | 89.9   | 95.9    | 98.53       | 52.16  | 50.18 | -     | 61.13       | 71.85  | 68.61 |
| Toothbrush        | 98          | 47.1   | 40.4 | 93.7  | 87.3        | 84.3   | 92.8    | 98.48       | 45.37  | 43.02 | -     | 61.84       | 78.65  | 69.81 |
| Toy               | 84.2        | 26     | 17.8 | 75.8  | 80.3        | 83.3   | 89.9    | 80.32       | 19.47  | 12.37 | -     | 47.04       | 80.13  | 68.09 |
| Toy Brick         | 98.9        | 56.5   | 56.9 | 91.2  | 85.9        | 75.6   | 85.2    | 97.73       | 32.03  | 25.41 | -     | 54.69       | 59.04  | 43.9  |
| Transistor        | 94.7        | 37     | 27.2 | 80.2  | 79.4        | 80.3   | 88.6    | 86.28       | 21.05  | 12.47 | -     | 59.39       | 77.97  | 72.56 |
| U Block           | 99.2        | 53.8   | 50.2 | 95.8  | 87.7        | 77.3   | 83.3    | 95.71       | 32.23  | 22.41 | -     | 78.29       | 69.38  | 75.75 |
| Usb               | 99.1        | 47.5   | 41.4 | 96.7  | 83.1        | 73.9   | 82.6    | 96.67       | 49.59  | 45.06 | -     | 54.48       | 39.1   | 39.55 |
| Usb Adaptor       | 98.8        | 37.8   | 28.4 | 92.5  | 86.9        | 77.5   | 84.3    | 97.63       | 42.81  | 33.58 | -     | 80.96       | 74.29  | 80.75 |
| Vcpill            | 98.3        | 67     | 65.4 | 88.5  | 84.3        | 74.8   | 82      | 95.45       | 43.35  | 40.93 | -     | 52.28       | 51.11  | 43.74 |
| Wooden Beads      | 98.4        | 47.6   | 44.2 | 89.6  | 79.5        | 75.4   | 86.2    | 95.39       | 19.8   | 13.34 | -     | 69.82       | 72.57  | 77.64 |
| Woodstick         | 99.1        | 63.7   | 66.7 | 96.7  | 92          | 72.7   | 78.9    | 99.57       | 58.02  | 59.74 | -     | 78.77       | 54     | 51.17 |
| Zipper            | 98          | 40.7   | 36.9 | 96.1  | 97.9        | 96.6   | 98.8    | 98.51       | 44.78  | 41.15 | -     | 88.31       | 86.38  | 94.81 |
| Average           | 97.9        | 49.4   | 45.7 | 91.9  | 85.8        | 79.5   | 85.8    | 95.39       | 40.51  | 36.73 | -     | 70.18       | 68.15  | 68.57 |

Table 28. Results for MultiADS and the most competitive baseline approach, April-GAN, for each product of the MAD dataset on few-shot (k=4) anomaly detection and segmentation tasks. Both models are trained on the MVTec-AD dataset.

| Baseline   | MultiADS    |        |      |       |             |        | April-GAN |       |             |      |       |       |             |      |  |
|------------|-------------|--------|------|-------|-------------|--------|-----------|-------|-------------|------|-------|-------|-------------|------|--|
| MAD        | Pixel-Level |        |      |       | Image-Level |        |           |       | Pixel-Level |      |       |       | Image-Level |      |  |
| Product    | AUROC       | F1-max | AP   | AUPRO | AUROC       | F1-max | AP        | AUROC | F1-max      | AP   | AUPRO | AUROC | F1-max      | AP   |  |
| Bear       | 91.8        | 16.9   | 11.9 | 82.9  | 71.9        | 93.7   | 94.6      | 91.2  | 13.1        | 8.5  | 79.8  | 64.1  | 93.5        | 92.5 |  |
| Bird       | 91.5        | 9.3    | 4.9  | 76.6  | 64.8        | 94.4   | 92.6      | 90.8  | 7.9         | 4.6  | 74.4  | 66.3  | 94.4        | 93.8 |  |
| Cat        | 94.4        | 8.7    | 4.9  | 86.4  | 57          | 94.5   | 92.3      | 94.1  | 9.2         | 5.6  | 84.5  | 58.4  | 94.5        | 92.6 |  |
| Elephant   | 72.5        | 6.7    | 3.8  | 67.4  | 72.9        | 93.9   | 95.8      | 71.5  | 6.7         | 3.7  | 65.7  | 64.6  | 93.9        | 94   |  |
| Gorilla    | 93.3        | 11.8   | 5.9  | 82.2  | 52.1        | 96.2   | 92.7      | 92.3  | 10.1        | 5.7  | 77.3  | 55.4  | 96.2        | 93.9 |  |
| Mallard    | 86.9        | 14.4   | 6.7  | 67.2  | 62          | 95.6   | 95        | 86.3  | 15.4        | 8    | 64.6  | 55.7  | 95.6        | 93.8 |  |
| Obesobeso  | 95.1        | 20.7   | 13.2 | 89.5  | 58.7        | 94.5   | 90.8      | 94.2  | 17.2        | 11.6 | 86.5  | 64.2  | 94.1        | 93.7 |  |
| Owl        | 92.8        | 15.9   | 9.6  | 81.4  | 72.6        | 93.2   | 94.2      | 92.4  | 12.5        | 7.5  | 79.7  | 67    | 93          | 93.4 |  |
| Parrot     | 85.7        | 9.2    | 5.1  | 66    | 66.5        | 92     | 91.7      | 85.2  | 7.2         | 4.4  | 68.5  | 59    | 91.8        | 89.8 |  |
| Phoenix    | 85.7        | 4.4    | 2    | 73.9  | 52.6        | 94.4   | 90.3      | 85.4  | 4.8         | 2.3  | 73.2  | 53.8  | 94.4        | 90.6 |  |
| Pig        | 95.5        | 13.9   | 10.2 | 86.5  | 61          | 94     | 93.2      | 95.3  | 14          | 9.5  | 85    | 62.9  | 94          | 93.9 |  |
| Puppy      | 88.2        | 12.8   | 7.7  | 75.2  | 68.7        | 92.9   | 94.1      | 87.5  | 9.8         | 6.9  | 72.6  | 63.4  | 92.9        | 92.6 |  |
| Sabertooth | 91.7        | 6.4    | 4.7  | 77.6  | 63.8        | 93.2   | 92.9      | 91    | 5.9         | 4.2  | 74.9  | 60.6  | 93.1        | 91.9 |  |
| Scorpion   | 90.7        | 8.7    | 6.2  | 82.7  | 62.1        | 92.9   | 91.8      | 91    | 8.8         | 6.8  | 81.7  | 65.2  | 92.9        | 93.3 |  |
| Sheep      | 94.2        | 12.5   | 9    | 85.4  | 63.5        | 93.3   | 93.1      | 94.2  | 12.1        | 8.8  | 84.6  | 60.5  | 93.3        | 92.7 |  |
| Swan       | 91          | 10.6   | 4.3  | 77.4  | 51          | 93.3   | 89.1      | 90.7  | 8.5         | 3.9  | 76.4  | 57.3  | 93.3        | 90.4 |  |
| Turtle     | 91.5        | 12.6   | 7.7  | 77    | 59.6        | 95.2   | 93.7      | 90.9  | 15.4        | 9.4  | 74.2  | 62.6  | 95.2        | 95   |  |
| Unicorn    | 87.6        | 5.1    | 4.1  | 74.3  | 54.6        | 95.7   | 94        | 87.3  | 5.3         | 4    | 71.3  | 60    | 95.7        | 95   |  |
| Whale      | 89.5        | 13.3   | 7.4  | 82    | 58.1        | 94.4   | 92.8      | 89.3  | 16.1        | 9.2  | 80.7  | 67.5  | 94.7        | 94.7 |  |
| Zalika     | 86.6        | 6.6    | 4.9  | 68.9  | 68          | 93.5   | 93.8      | 86    | 6           | 4.6  | 65.9  | 65.8  | 93.1        | 93.5 |  |
| Average    | 89.8        | 11     | 6.7  | 78    | 62.1        | 94     | 92.9      | 89.3  | 10.3        | 6.5  | 76.1  | 61.7  | 94          | 93.1 |  |

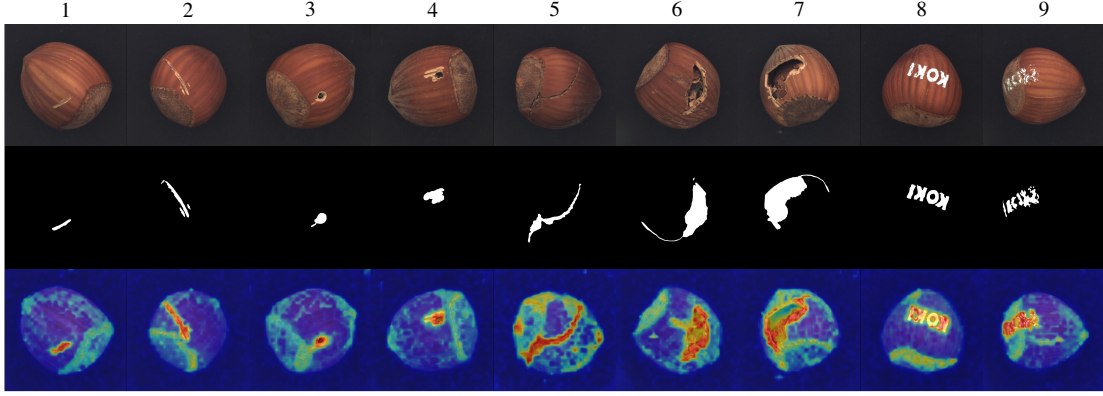

Figure 1. This visualization showcases the **hazelnut** product from the MVTec AD dataset (trained on the VisA dataset). The first row displays the input images, the second row presents the ground truth masks of anomalies, and the third row shows the predicted anomaly maps generated by the model. The model is trained on the VisA dataset and evaluated on the MVTec AD dataset using a few-shot setting with  $k = 4$ . As shown in the figure, our approach effectively distinguishes defect types such as **scratches** (Columns 1, 2) and **holes** (Columns 3, 4). However, for large **cracks** (Columns 6, 7), the method tends to focus on the edges while marking the interior as normal. This behavior is likely due to the patch-level features being more localized and lacking global context.

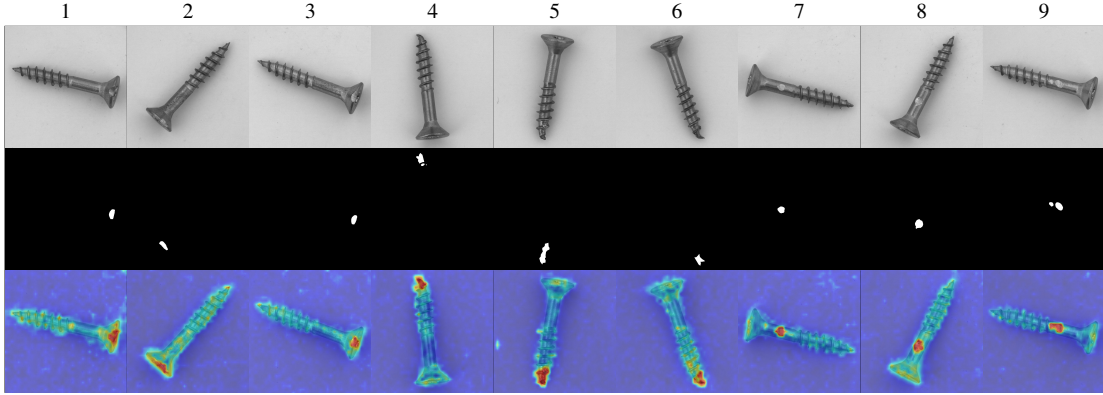

Figure 2. This visualization showcases the **screw** product from the MVTec AD dataset (trained on the VisA dataset). Our model successfully detects defects such as **scratches** (Columns 1-3, 7-9) and **bends** (Columns 4-6) in the front part. Our model also allocates some attention to the screw body.

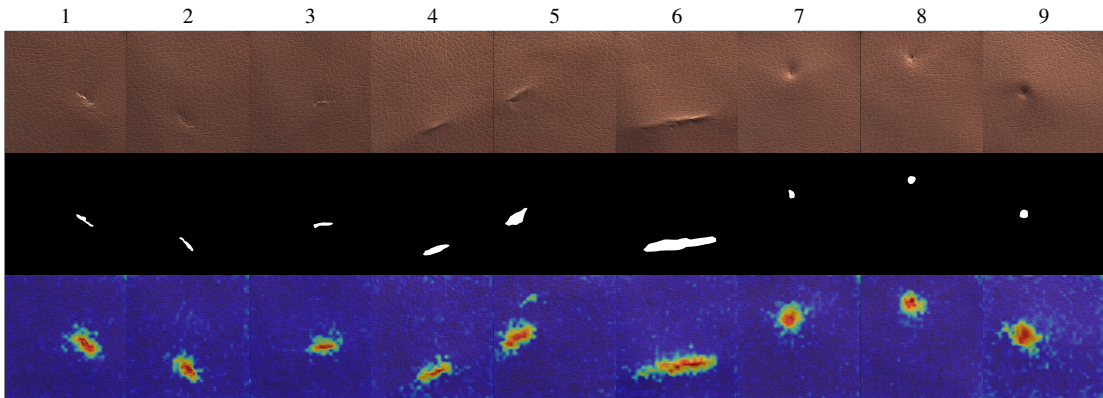

Figure 3. This visualization showcases the **leather** product from the MVTec AD dataset. Our approach can easily identify the defect of **cut** (Columns 1-3), **fold** (Columns 4-6), and **poke** (Columns 7-9).



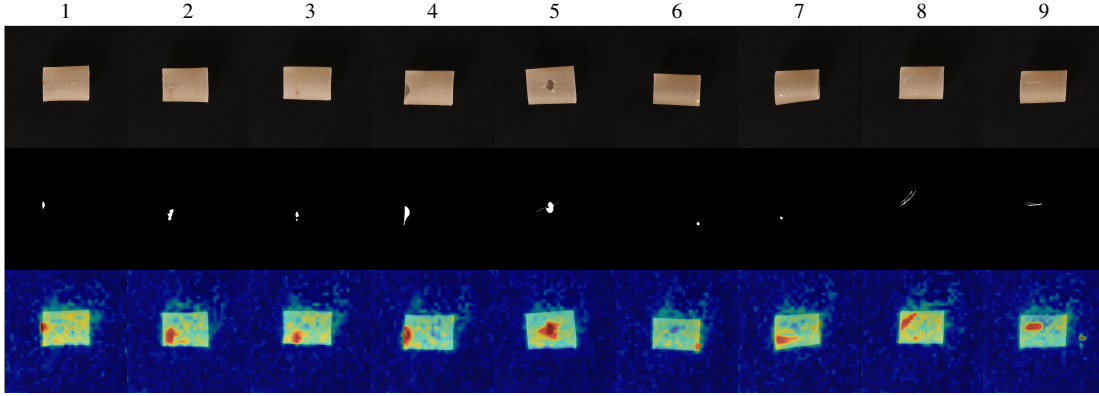

Figure 4. This visualization showcases the **pipe\_fryum** product from the VisA dataset (trained on the MVTec-AD dataset). Our model can identify the defects like **color spots** (Columns 1-3), **broken** (Columns 4-5), and **scratches** (Columns 6-9).

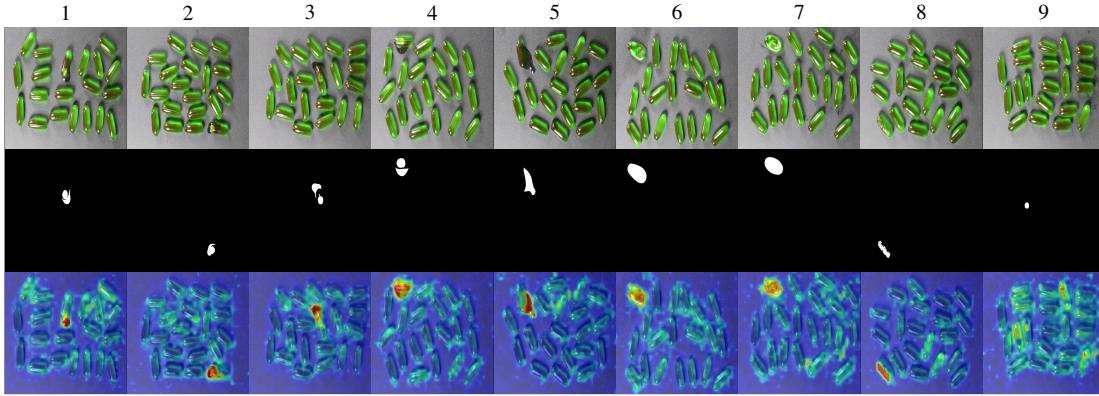

Figure 5. This visualization showcases the **capsule** product from the VisA dataset (trained on the MVTec-AD dataset). Our model effectively identifies defects such as **leakage** (Columns 1–5), **misshapes** (Columns 6–7), and **scratches** (Column 8) with clear accuracy. However, it tends to overlook **bubble** defect (Columns 1 and 9), and product highlights are occasionally misclassified as defects (Column 9).

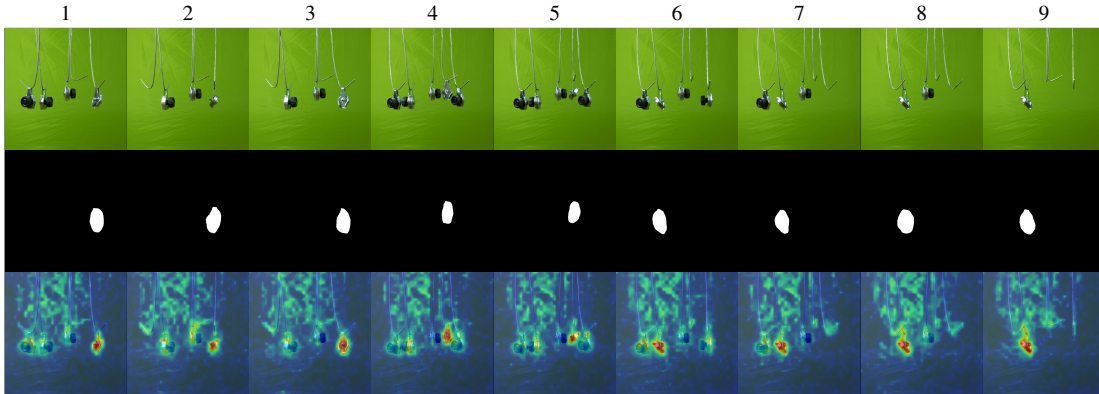

Figure 6. This visualization showcases the **connector** product from the MPDD dataset (trained on the MVTec-AD dataset). Our model effectively identifies **part-missing** defects. However, wrinkles in the green background can sometimes mislead the model, causing them to be misclassified as anomalies.

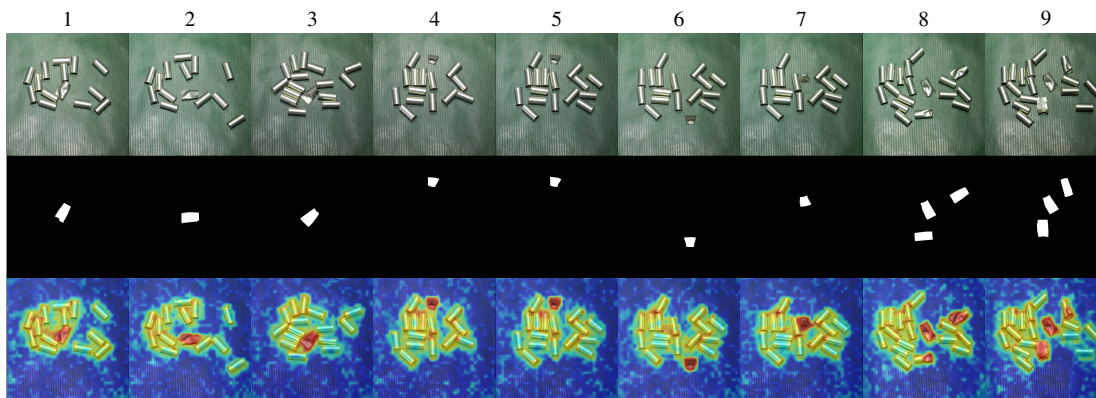

Figure 7. This visualization showcases the **tube** product from the MPDD dataset (trained on the MVTec-AD dataset). Our model successfully identifies **flattened** tubes but also introduces some noise, such as misclassifying the edges of the tubes as anomalies.

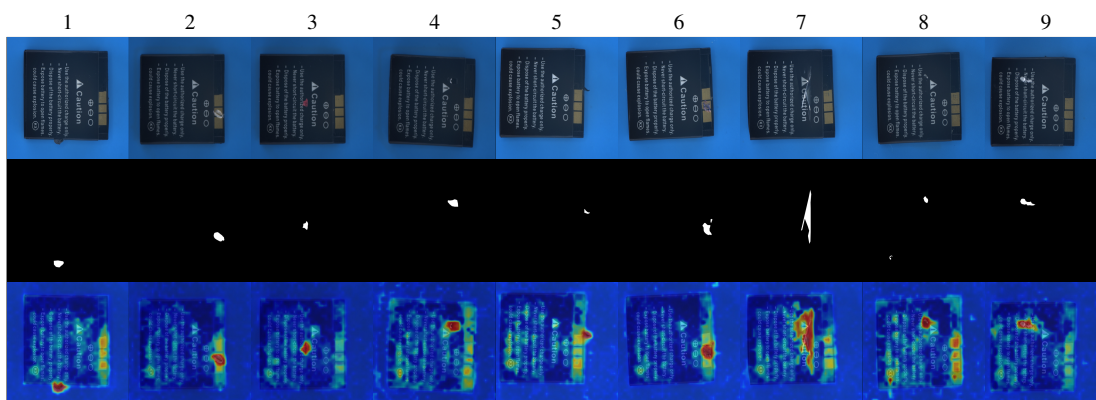

Figure 8. This visualization showcases the **phone battery** product from the Real-IAD dataset (trained on the MVTec-AD dataset). Our model successfully identifies defects like **contamination**, **scratch**, and **damage**.

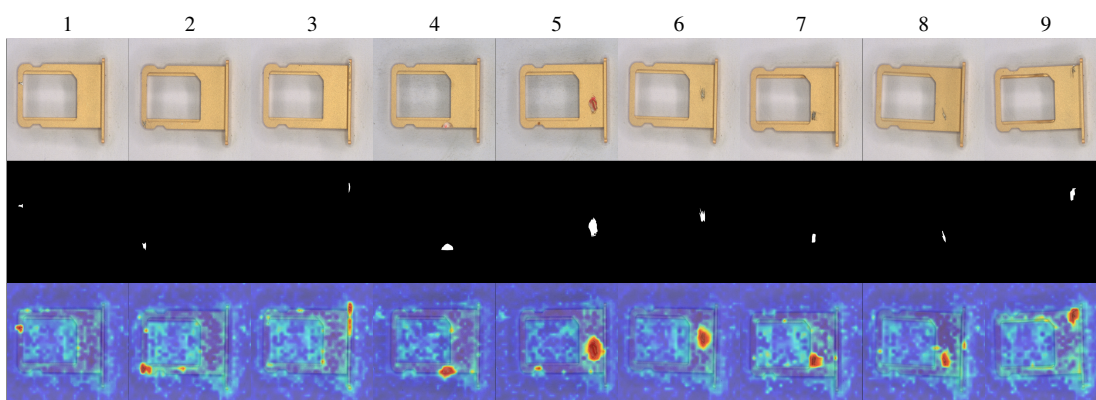

Figure 9. This visualization showcases the **sim card set** product from the Real-IAD dataset (trained on the MVTec-AD dataset). Our model successfully identifies defects like **scratch** and **damage**.

## References

- [1] Paul Bergmann, Michael Fauser, David Sattlegger, and Carsten Steger. Mvtec ad — a comprehensive real-world dataset for unsupervised anomaly detection. In *2019 IEEE/CVF Conference on Computer Vision and Pattern Recognition (CVPR)*, pages 9584–9592, 2019. 1, 4, 5, 12
- [2] Xuhai Chen, Yue Han, and Jiangning Zhang. A zero-/few-shot anomaly classification and segmentation method for cvpr 2023 vand workshop challenge tracks 1&2: 1st place on zero-shot ad and 4th place on few-shot ad. *arXiv preprint arXiv:2305.17382*, 2023. 1, 9
- [3] Simon Damm, Mike Laszkiewicz, Johannes Lederer, and Asja Fischer. Anomalydino: Boosting patch-based few-shot anomaly detection with dinov2. *CoRR*, abs/2405.14529, 2024. 12
- [4] Thomas Defard, Aleksandr Setkov, Angelique Loesch, and Romaric Audigier. Padim: A patch distribution modeling framework for anomaly detection and localization. In *Pattern Recognition. ICPR International Workshops and Challenges*, pages 475–489, Cham, 2021. Springer International Publishing. 9
- [5] Zheng Fang, Xiaoyang Wang, Haocheng Li, Jiejie Liu, Qiugui Hu, and Jimin Xiao. Fastrecon: Few-shot industrial anomaly detection via fast feature reconstruction. In *2023 IEEE/CVF International Conference on Computer Vision (ICCV)*, pages 17435–17444, 2023. 10
- [6] Chaoqin Huang, Haoyan Guan, Aofan Jiang, Ya Zhang, Michael Spratling, and Yan-Feng Wang. Registration based few-shot anomaly detection. In *Computer Vision – ECCV 2022: 17th European Conference, Tel Aviv, Israel, October 23–27, 2022, Proceedings, Part XXIV*, page 303–319, Berlin, Heidelberg, 2022. Springer-Verlag. 9
- [7] Gabriel Ilharco, Mitchell Wortsman, Ross Wightman, Cade Gordon, Nicholas Carlini, Rohan Taori, Achal Dave, Vaishal Shankar, Hongseok Namkoong, John Miller, Hannaneh Hajishirzi, Ali Farhadi, and Ludwig Schmidt. Openclip, 2021. 10
- [8] Jongheon Jeong, Yang Zou, Taewan Kim, Dongqing Zhang, Avinash Ravichandran, and Onkar Dabeer. Winclip: Zero-/few-shot anomaly classification and segmentation. In *CVPR*, pages 19606–19616. IEEE, 2023. 9
- [9] Stepan Jezek, Martin Jonak, Radim Burget, Pavel Dvorak, and Milos Skotak. Deep learning-based defect detection of metal parts: evaluating current methods in complex conditions. In *2021 13th International Congress on Ultra Modern Telecommunications and Control Systems and Workshops (ICUMT)*, pages 66–71, 2021. 1, 4, 5, 12
- [10] Aodong Li, Chen Qiu, Marius Kloft, Padhraic Smyth, Maja Rudolph, and Stephan Mandt. Zero-shot anomaly detection via batch normalization. In *NeurIPS*, 2023. 12
- [11] Xurui Li, Ziming Huang, Feng Xue, and Yu Zhou. Musc: Zero-shot industrial anomaly classification and segmentation with mutual scoring of the unlabeled images. In *International Conference on Learning Representations*, 2024. 12
- [12] Xiaofan Li, Zhizhong Zhang, Xin Tan, Chengwei Chen, Yanyun Qu, Yuan Xie, and Lizhuang Ma. Promptad: Learning prompts with only normal samples for few-shot anomaly detection. In *Proceedings of the IEEE/CVF Conference on Computer Vision and Pattern Recognition (CVPR)*, pages 16838–16848, 2024. 10
- [13] Alec Radford, Jong Wook Kim, Chris Hallacy, Aditya Ramesh, Gabriel Goh, Sandhini Agarwal, Girish Sastry, Amanda Askell, Pamela Mishkin, Jack Clark, Gretchen Krueger, and Ilya Sutskever. Learning transferable visual models from natural language supervision. In *ICML*, pages 8748–8763. PMLR, 2021. 5, 9
- [14] Karsten Roth, Latha Pemula, Joaquin Zepeda, Bernhard Schölkopf, Thomas Brox, and Peter Gehler. Towards total recall in industrial anomaly detection. In *2022 IEEE/CVF Conference on Computer Vision and Pattern Recognition (CVPR)*, pages 14298–14308, 2022. 9
- [15] Chengjie Wang, Wenbing Zhu, Bin-Bin Gao, Zhenye Gan, Jiangning Zhang, Zhihao Gu, Shuguang Qian, Mingang Chen, and Lizhuang Ma. Real-iad: A real-world multi-view dataset for benchmarking versatile industrial anomaly detection. In *Proceedings of the IEEE/CVF Conference on Computer Vision and Pattern Recognition*, pages 22883–22892, 2024. 1, 4, 5, 12
- [16] Guoyang Xie, Jinbao Wang, Jiaqi Liu, Yaochu Jin, and Feng Zheng. Pushing the limits of fewshot anomaly detection in industry vision: Graphcore. In *The Eleventh International Conference on Learning Representations*, 2023. 9
- [17] Kaiyang Zhou, Jingkan Yang, Chen Change Loy, and Ziwei Liu. Conditional prompt learning for vision-language models. In *IEEE/CVF Conference on Computer Vision and Pattern Recognition (CVPR)*, 2022. 9
- [18] Kaiyang Zhou, Jingkan Yang, Chen Change Loy, and Ziwei Liu. Learning to prompt for vision-language models. *International Journal of Computer Vision (IJCV)*, 2022. 9
- [19] Qiang Zhou, Weize Li, Lihan Jiang, Guoliang Wang, Guyue Zhou, Shanghang Zhang, and Hao Zhao. Pad: A dataset and benchmark for pose-agnostic anomaly detection. *arXiv preprint arXiv:2310.07716*, 2023. 1, 4, 5, 12
- [20] Qihang Zhou, Guansong Pang, Yu Tian, Shibo He, and Jiming Chen. Anomalyclip: Object-agnostic prompt learning for zero-shot anomaly detection. In *ICLR*. OpenReview.net, 2024. 9, 10
- [21] Jiawen Zhu and Guansong Pang. Toward generalist anomaly detection via in-context residual learning with few-shot sample prompts. In *Proceedings of the IEEE/CVF Conference on Computer Vision and Pattern Recognition (CVPR)*, pages 17826–17836, 2024. 9, 10
- [22] Yang Zou, Jongheon Jeong, Latha Pemula, Dongqing Zhang, and Onkar Dabeer. Spot-the-difference self-supervised pre-training for anomaly detection and segmentation. *arXiv preprint arXiv:2207.14315*, 2022. 1, 4, 5, 12
